# Supplementary material for: A combined experimental and theoretical study on the structures, interactions and volumetric properties of guanidinium-based ionic liquid mixtures
Source: Royal Society of Chemistry journal article supplement (doi:10.1039/c9cp02999k), 2019-01-01
Supplement: c9cp02999k1.pdf [file c9cp02999k1.pdf]

# A Combined Experimental and Theoretical Study on Structures, Interactions and Volumetric Properties of Guanidinium–Based Ionic Liquid Mixtures

Xiaoxing Lu<sup>a,c,\*</sup>, Hujun Xie<sup>b,\*</sup>, Qunfang Lei<sup>c</sup> and Wenjun Fang<sup>c,\*</sup>

<sup>a</sup>School of Pharmacy, Guangdong Pharmaceutical University, Guangzhou 510006, P.  
R. China

<sup>b</sup>Department of Applied Chemistry, Zhejiang Gongshang University, Hangzhou  
310018, P. R. China

<sup>c</sup>Department of Chemistry, Zhejiang University, Hangzhou 310027, P. R. China

## Corresponding Author

E-mail Address: [xxlu@zju.edu.cn](mailto:xxlu@zju.edu.cn) (X. X. Lu); [hjxie@zjgsu.edu.cn](mailto:hjxie@zjgsu.edu.cn) (H. J. Xie);  
[fwjun@zju.edu.cn](mailto:fwjun@zju.edu.cn) (W. J. Fang)

## Electronic Supplementary Information

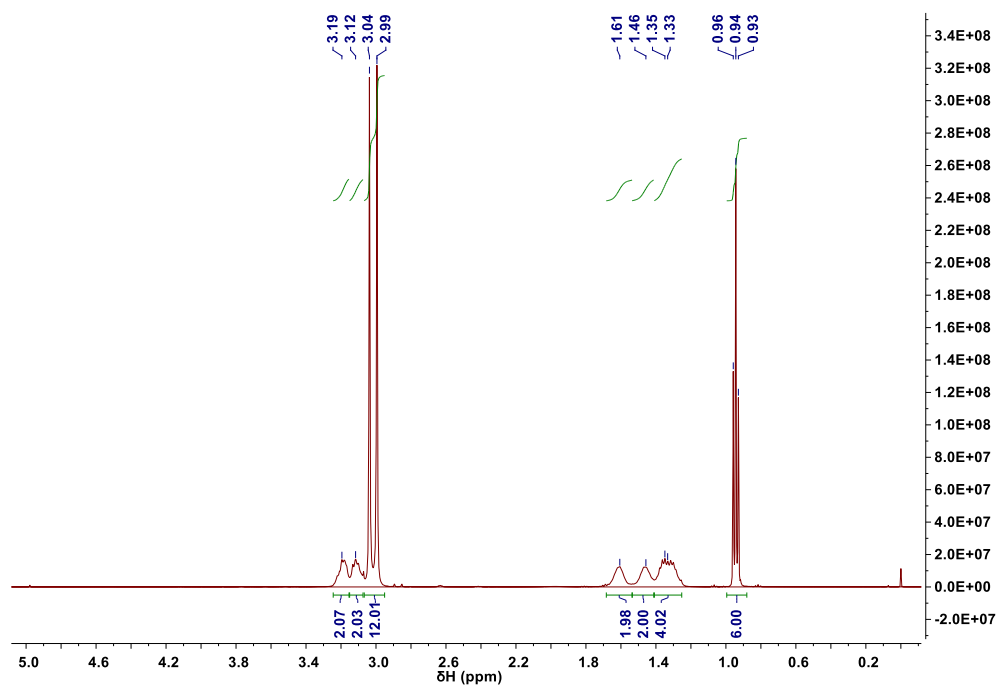

**Fig. S1**  $^1\text{H}$  NMR spectrum of 2,2-dibutyl-1,1,3,3-tetramethylguanidinium bis(trifluoromethylsulfonyl)amide at 298 K. Solvent is  $\text{CDCl}_3$ .

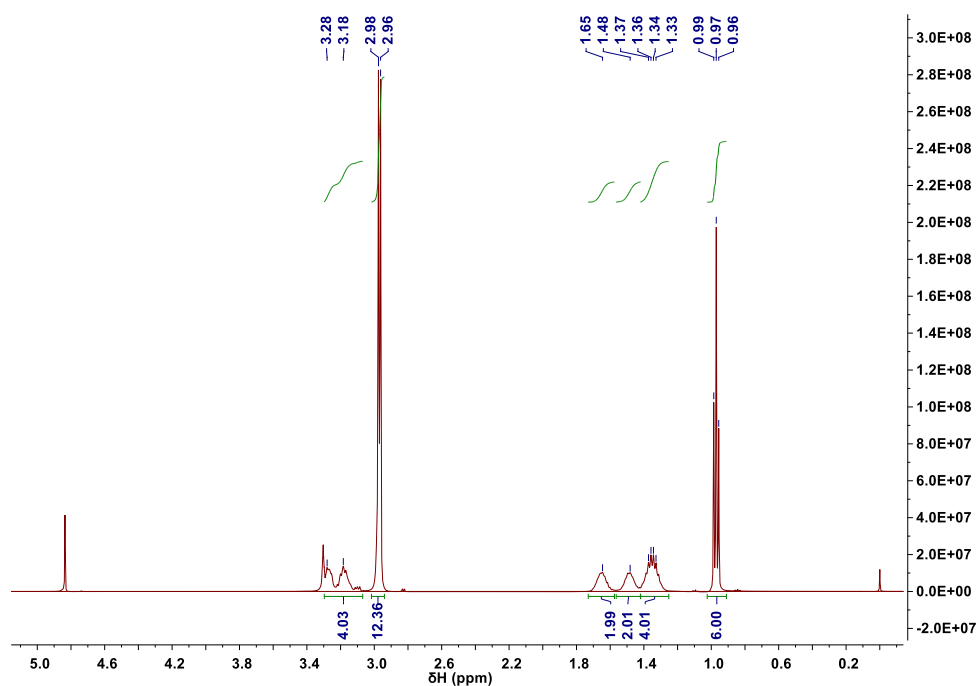

**Fig. S2**  $^1\text{H}$  NMR spectrum of 2,2-dibutyl-1,1,3,3-tetramethylguanidinium dicyanamide at 298 K. Solvent is  $\text{CD}_3\text{OD}$ .

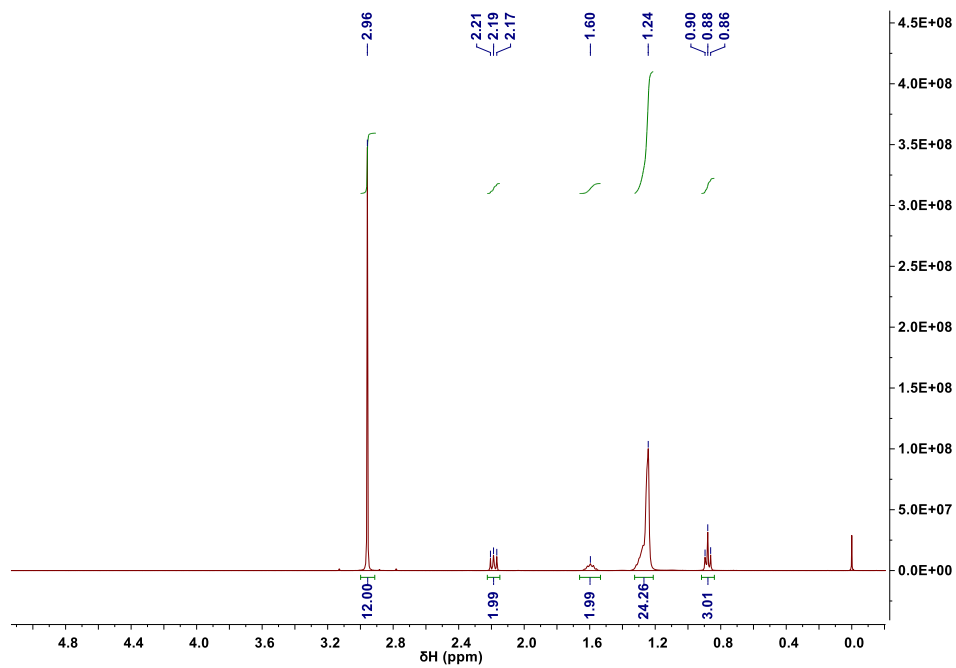

**Fig. S3**  $^1\text{H}$  NMR spectrum of 1,1,3,3-tetramethylguanidinium palmitate at 298 K. Solvent is  $\text{CDCl}_3$ .

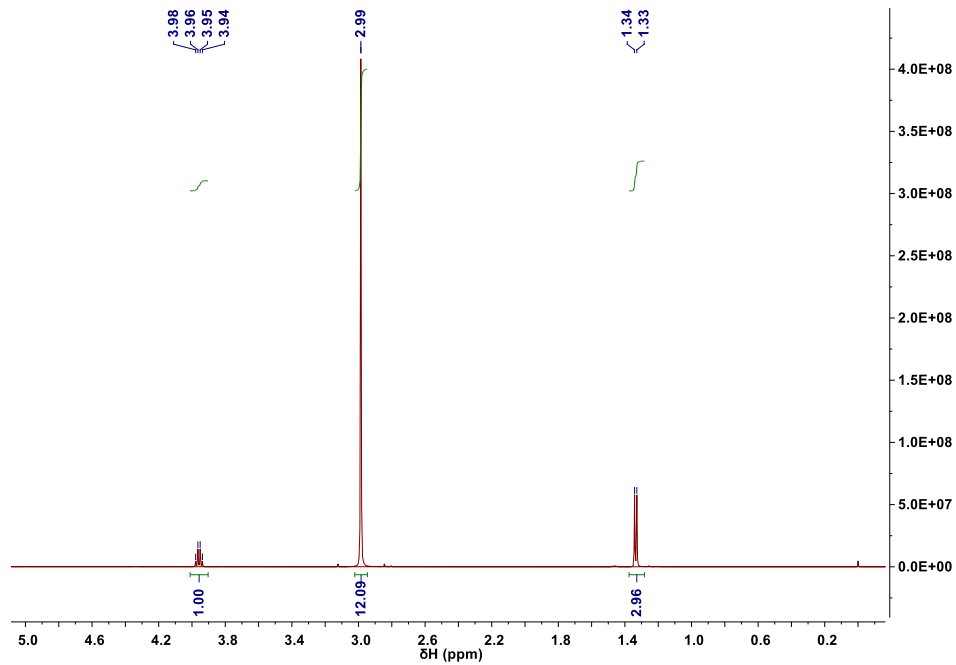

**Fig. S4**  $^1\text{H}$  NMR spectrum of 1,1,3,3-tetramethylguanidinium L-lactate at 298 K. Solvent is  $\text{CDCl}_3$ .

**Table S1** Densities ( $\rho/\text{g}\cdot\text{cm}^{-3}$ ) of IL–IL mixtures at different temperatures ( $T$ ) and pressure ( $p$ ) of 101 kPa.

| mole fraction<br>( $x$ ) | $T / \text{K}$                                                                                                                              |         |         |         |         |         |         |
|--------------------------|---------------------------------------------------------------------------------------------------------------------------------------------|---------|---------|---------|---------|---------|---------|
|                          | 293.15                                                                                                                                      | 298.15  | 303.15  | 308.15  | 313.15  | 318.15  | 323.15  |
| $x_{1a}$                 | [TMG(C <sub>2</sub> )] <sub>x</sub> [C <sub>2</sub> OSO <sub>3</sub> ] <sub>1-x</sub> ( <b>1a+1b</b> )                                      |         |         |         |         |         |         |
| 0.0000                   | 1.41489                                                                                                                                     | 1.41003 | 1.40519 | 1.40038 | 1.39559 | 1.39080 | 1.38603 |
| 0.1001                   | 1.39458                                                                                                                                     | 1.38983 | 1.38508 | 1.38036 | 1.37566 | 1.37098 | 1.36632 |
| 0.1993                   | 1.37347                                                                                                                                     | 1.36884 | 1.36423 | 1.35964 | 1.35507 | 1.35050 | 1.34594 |
| 0.2993                   | 1.35149                                                                                                                                     | 1.34697 | 1.34248 | 1.33800 | 1.33353 | 1.32908 | 1.32464 |
| 0.4009                   | 1.32807                                                                                                                                     | 1.32366 | 1.31928 | 1.31492 | 1.31057 | 1.30623 | 1.30191 |
| 0.5005                   | 1.30439                                                                                                                                     | 1.30011 | 1.29586 | 1.29162 | 1.28738 | 1.28314 | 1.27892 |
| 0.6008                   | 1.28009                                                                                                                                     | 1.27597 | 1.27188 | 1.26779 | 1.26372 | 1.25965 | 1.25559 |
| 0.6991                   | 1.25524                                                                                                                                     | 1.25126 | 1.24730 | 1.24335 | 1.23941 | 1.23548 | 1.23156 |
| 0.7996                   | 1.22855                                                                                                                                     | 1.22472 | 1.22093 | 1.21714 | 1.21335 | 1.20958 | 1.20583 |
| 0.9001                   | 1.20045                                                                                                                                     | 1.19683 | 1.19322 | 1.18961 | 1.18600 | 1.18239 | 1.17879 |
| 1.0000                   | 1.17076                                                                                                                                     | 1.16724 | 1.16376 | 1.16028 | 1.15680 | 1.15333 | 1.14987 |
| $x_{1a}$                 | [TMG(C <sub>2</sub> )] <sub>x</sub> [TMG(C <sub>2</sub> ) <sub>2</sub> ] <sub>1-x</sub> [C <sub>2</sub> OSO <sub>3</sub> ] ( <b>1a+2a</b> ) |         |         |         |         |         |         |
| 0.0000                   | 1.14134                                                                                                                                     | 1.13777 | 1.13421 | 1.13065 | 1.12711 | 1.12357 | 1.12003 |
| 0.0999                   | 1.14412                                                                                                                                     | 1.14056 | 1.13700 | 1.13345 | 1.12991 | 1.12638 | 1.12285 |
| 0.1997                   | 1.14692                                                                                                                                     | 1.14336 | 1.13981 | 1.13627 | 1.13274 | 1.12921 | 1.12568 |
| 0.2995                   | 1.14989                                                                                                                                     | 1.14633 | 1.14279 | 1.13925 | 1.13572 | 1.13220 | 1.12868 |
| 0.3998                   | 1.15300                                                                                                                                     | 1.14945 | 1.14593 | 1.14240 | 1.13888 | 1.13537 | 1.13186 |
| 0.5001                   | 1.15625                                                                                                                                     | 1.15272 | 1.14920 | 1.14569 | 1.14220 | 1.13871 | 1.13523 |
| 0.5994                   | 1.15936                                                                                                                                     | 1.15584 | 1.15234 | 1.14884 | 1.14535 | 1.14187 | 1.13839 |
| 0.7006                   | 1.16252                                                                                                                                     | 1.15900 | 1.15551 | 1.15202 | 1.14854 | 1.14507 | 1.14160 |
| 0.7995                   | 1.16523                                                                                                                                     | 1.16171 | 1.15823 | 1.15473 | 1.15124 | 1.14776 | 1.14429 |
| 0.8978                   | 1.16784                                                                                                                                     | 1.16433 | 1.16085 | 1.15737 | 1.15390 | 1.15043 | 1.14697 |

|          |                                                                                                                                                       |         |         |         |         |         |         |
|----------|-------------------------------------------------------------------------------------------------------------------------------------------------------|---------|---------|---------|---------|---------|---------|
| 1.0000   | 1.17076                                                                                                                                               | 1.16724 | 1.16376 | 1.16028 | 1.15680 | 1.15333 | 1.14987 |
| $x_{2b}$ | [TMG(C <sub>2</sub> ) <sub>2</sub> ] <sub>x</sub> [TMG(C <sub>2</sub> )] <sub>1-x</sub> [NTf <sub>2</sub> ] ( <b>2b+1b</b> )                          |         |         |         |         |         |         |
| 0.0000   | 1.41489                                                                                                                                               | 1.41003 | 1.40519 | 1.40038 | 1.39559 | 1.39080 | 1.38603 |
| 0.1001   | 1.41070                                                                                                                                               | 1.40586 | 1.40105 | 1.39626 | 1.39149 | 1.38672 | 1.38197 |
| 0.2003   | 1.40662                                                                                                                                               | 1.40180 | 1.39700 | 1.39223 | 1.38748 | 1.38274 | 1.37801 |
| 0.3002   | 1.40268                                                                                                                                               | 1.39788 | 1.39310 | 1.38836 | 1.38363 | 1.37891 | 1.37420 |
| 0.3996   | 1.39881                                                                                                                                               | 1.39403 | 1.38927 | 1.38454 | 1.37984 | 1.37515 | 1.37047 |
| 0.4980   | 1.39509                                                                                                                                               | 1.39033 | 1.38560 | 1.38089 | 1.37621 | 1.37154 | 1.36689 |
| 0.5975   | 1.39156                                                                                                                                               | 1.38681 | 1.38208 | 1.37739 | 1.37273 | 1.36808 | 1.36344 |
| 0.6992   | 1.38796                                                                                                                                               | 1.38323 | 1.37853 | 1.37385 | 1.36921 | 1.36458 | 1.35997 |
| 0.8006   | 1.38446                                                                                                                                               | 1.37974 | 1.37506 | 1.37041 | 1.36578 | 1.36118 | 1.35658 |
| 0.9000   | 1.38116                                                                                                                                               | 1.37645 | 1.37179 | 1.36715 | 1.36255 | 1.35797 | 1.35340 |
| 1.0000   | 1.37786                                                                                                                                               | 1.37316 | 1.36851 | 1.36390 | 1.35932 | 1.35476 | 1.35021 |
| $x_{2b}$ | [TMG(C <sub>2</sub> ) <sub>2</sub> ] <sub>2</sub> [NTf <sub>2</sub> ] <sub>x</sub> [C <sub>2</sub> OSO <sub>3</sub> ] <sub>1-x</sub> ( <b>2b+2a</b> ) |         |         |         |         |         |         |
| 0.0000   | 1.14134                                                                                                                                               | 1.13777 | 1.13421 | 1.13065 | 1.12711 | 1.12357 | 1.12003 |
| 0.1001   | 1.16906                                                                                                                                               | 1.16535 | 1.16166 | 1.15797 | 1.15430 | 1.15063 | 1.14696 |
| 0.1995   | 1.19575                                                                                                                                               | 1.19192 | 1.18810 | 1.18429 | 1.18051 | 1.17672 | 1.17294 |
| 0.3004   | 1.22179                                                                                                                                               | 1.21783 | 1.21389 | 1.20996 | 1.20605 | 1.20215 | 1.19825 |
| 0.3991   | 1.24627                                                                                                                                               | 1.24218 | 1.23812 | 1.23406 | 1.23003 | 1.22601 | 1.22199 |
| 0.5005   | 1.27050                                                                                                                                               | 1.26629 | 1.26211 | 1.25795 | 1.25381 | 1.24968 | 1.24556 |
| 0.5990   | 1.29317                                                                                                                                               | 1.28887 | 1.28460 | 1.28033 | 1.27609 | 1.27186 | 1.26764 |
| 0.7000   | 1.31549                                                                                                                                               | 1.31107 | 1.30669 | 1.30232 | 1.29799 | 1.29367 | 1.28935 |
| 0.8001   | 1.33693                                                                                                                                               | 1.33243 | 1.32797 | 1.32354 | 1.31912 | 1.31471 | 1.31031 |
| 0.9001   | 1.35740                                                                                                                                               | 1.35280 | 1.34825 | 1.34373 | 1.33923 | 1.33474 | 1.33026 |
| 1.0000   | 1.37786                                                                                                                                               | 1.37316 | 1.36851 | 1.36390 | 1.35932 | 1.35476 | 1.35021 |

---

Uncertainties are  $u(T) = 0.01$  K,  $u(p) = 1000$  Pa,  $u(x) = 0.0001$ , and  $u(\rho) = 0.0003$  g·cm<sup>-3</sup>.

**Table S2 Cartesian coordinates for all of the calculated IL-IL clusters**

|           |           |           |           |           |           |           |           |  |
|-----------|-----------|-----------|-----------|-----------|-----------|-----------|-----------|--|
| <b>1a</b> |           |           |           | H         | -1.907113 | 2.866970  | -0.866547 |  |
| H         | -0.835144 | 0.964358  | 1.185461  | H         | -3.106272 | 3.711748  | 0.140689  |  |
| C         | -1.732873 | -0.588397 | 0.308160  | H         | -1.484833 | 3.364936  | 0.774011  |  |
| N         | -2.469003 | -0.917673 | -0.789963 | S         | 1.559330  | 1.075749  | -0.119087 |  |
| N         | -0.983744 | -1.537945 | 0.913626  | O         | 0.647774  | 0.461919  | -1.126168 |  |
| C         | -2.541308 | -0.023239 | -1.947277 | O         | 2.348015  | 2.218457  | -0.600885 |  |
| H         | -2.287821 | -0.595616 | -2.847596 | O         | 0.894803  | 1.269735  | 1.209804  |  |
| H         | -3.547163 | 0.397769  | -2.074914 | O         | 2.654781  | -0.134163 | 0.272622  |  |
| H         | -1.800394 | 0.768398  | -1.839253 | C         | 3.663953  | -0.402672 | -0.722697 |  |
| C         | -3.072125 | -2.235110 | -0.956140 | H         | 4.217980  | 0.520047  | -0.925530 |  |
| H         | -3.056821 | -2.774889 | -0.008041 | H         | 3.178937  | -0.728887 | -1.652357 |  |
| H         | -4.115094 | -2.112164 | -1.273755 | C         | 4.576012  | -1.484935 | -0.167784 |  |
| H         | -2.551061 | -2.832729 | -1.716192 | H         | 4.019281  | -2.407825 | 0.032492  |  |
| C         | -0.549167 | -1.393463 | 2.307884  | H         | 5.368194  | -1.711415 | -0.892119 |  |
| H         | -0.437787 | -2.396621 | 2.732421  | H         | 5.044193  | -1.155273 | 0.766030  |  |
| H         | 0.403185  | -0.856241 | 2.369392  |           |           |           |           |  |
| H         | -1.306831 | -0.849295 | 2.875125  | <b>1b</b> |           |           |           |  |
| C         | -0.203052 | -2.500702 | 0.128850  | C         | 2.843629  | -0.492999 | 0.182562  |  |
| H         | 0.858978  | -2.334352 | 0.336466  | N         | 2.870636  | -0.492453 | 1.535559  |  |
| H         | -0.474533 | -3.529405 | 0.395915  | N         | 3.723461  | 0.283922  | -0.503335 |  |
| H         | -0.360002 | -2.334339 | -0.935439 | C         | 2.332442  | -1.612766 | 2.314511  |  |
| N         | -1.755800 | 0.640829  | 0.828295  | H         | 2.894517  | -1.672565 | 3.251961  |  |
| C         | -2.815161 | 1.644801  | 0.703900  | H         | 1.268670  | -1.476541 | 2.535701  |  |
| H         | -3.618488 | 1.238927  | 0.084357  | H         | 2.462846  | -2.546266 | 1.763967  |  |
| H         | -3.237134 | 1.808154  | 1.705328  | C         | 3.043879  | 0.753041  | 2.292111  |  |
| C         | -2.295729 | 2.974004  | 0.150564  | H         | 3.134139  | 1.598845  | 1.612893  |  |

|   |           |           |           |           |           |           |           |
|---|-----------|-----------|-----------|-----------|-----------|-----------|-----------|
| H | 2.151933  | 0.916916  | 2.905296  | O         | 0.435498  | 1.407295  | 0.675430  |
| H | 3.925729  | 0.694057  | 2.941351  | O         | 0.037405  | 1.727741  | -1.800583 |
| C | 3.357907  | 0.981439  | -1.741599 | C         | -1.658733 | 2.877909  | -0.110606 |
| H | 3.627026  | 2.038813  | -1.635614 | F         | -2.271299 | 2.714841  | 1.066262  |
| H | 3.897040  | 0.569623  | -2.603803 | F         | -0.940524 | 4.014060  | -0.071599 |
| H | 2.282795  | 0.933067  | -1.910269 | F         | -2.583256 | 2.987763  | -1.072445 |
| C | 5.062618  | 0.568699  | 0.006495  | H         | 1.109011  | -1.523309 | 0.029680  |
| H | 5.786504  | 0.411250  | -0.802021 |           |           |           |           |
| H | 5.155834  | 1.606056  | 0.352818  | <b>2a</b> |           |           |           |
| H | 5.303616  | -0.106133 | 0.829015  | C         | 1.592683  | 0.267354  | 0.444791  |
| N | 1.986479  | -1.295752 | -0.456171 | N         | 1.771100  | -0.613507 | 1.458008  |
| S | -1.677175 | -0.879568 | 0.660743  | N         | 0.899440  | 1.401880  | 0.657393  |
| O | -2.235586 | -0.346893 | 1.905755  | C         | 2.966872  | -1.442220 | 1.566939  |
| O | -0.544190 | -1.838023 | 0.788282  | H         | 3.265961  | -1.479886 | 2.620814  |
| C | 2.121174  | -1.825188 | -1.819015 | H         | 2.781478  | -2.469455 | 1.227849  |
| H | 3.167218  | -1.721921 | -2.120049 | H         | 3.779457  | -1.010699 | 0.982150  |
| H | 1.510607  | -1.228569 | -2.507294 | C         | 0.706226  | -0.943646 | 2.415392  |
| C | 1.686607  | -3.290242 | -1.870901 | H         | -0.231090 | -0.462615 | 2.134943  |
| H | 1.755193  | -3.658257 | -2.900594 | H         | 0.544680  | -2.027325 | 2.387354  |
| H | 2.323512  | -3.916933 | -1.236499 | H         | 1.001663  | -0.656969 | 3.432689  |
| H | 0.649014  | -3.404041 | -1.540071 | C         | 0.034382  | 1.996018  | -0.368829 |
| C | -3.043906 | -1.898317 | -0.141877 | H         | -0.943153 | 2.175260  | 0.085216  |
| F | -2.623811 | -2.459331 | -1.284589 | H         | 0.455907  | 2.941997  | -0.734705 |
| F | -3.385336 | -2.874644 | 0.713398  | H         | -0.120776 | 1.289242  | -1.181224 |
| F | -4.118807 | -1.146259 | -0.390855 | C         | 0.780991  | 2.019698  | 1.978500  |
| N | -1.475240 | 0.155834  | -0.566543 | H         | 0.902620  | 3.102952  | 1.860948  |
| S | -0.501198 | 1.431241  | -0.466727 | H         | -0.203663 | 1.819913  | 2.414191  |

|   |           |           |           |           |           |           |           |
|---|-----------|-----------|-----------|-----------|-----------|-----------|-----------|
| H | 1.564516  | 1.649427  | 2.641115  | H         | 3.993458  | -2.168281 | -1.023104 |
| N | 2.196984  | 0.035170  | -0.754851 |           |           |           |           |
| C | 2.693529  | 1.140171  | -1.598358 | <b>2b</b> |           |           |           |
| H | 1.867966  | 1.710890  | -2.037704 | C         | -3.049133 | 0.038291  | 0.065733  |
| H | 3.212997  | 0.663812  | -2.432680 | N         | -3.064342 | 0.726640  | -1.095330 |
| C | 3.669206  | 2.074196  | -0.880055 | N         | -3.475890 | 0.654154  | 1.200823  |
| H | 4.047248  | 2.820455  | -1.588267 | C         | -3.225999 | 0.083685  | -2.398897 |
| H | 3.194012  | 2.610854  | -0.052970 | H         | -3.912270 | 0.691872  | -2.998748 |
| H | 4.525572  | 1.517065  | -0.483474 | H         | -2.269032 | 0.013895  | -2.928051 |
| S | -2.165129 | -0.784869 | 0.063335  | H         | -3.650578 | -0.912247 | -2.275562 |
| O | -0.817705 | -1.059743 | -0.506198 | C         | -2.756719 | 2.162629  | -1.156113 |
| O | -2.105447 | 0.161534  | 1.217963  | H         | -2.353499 | 2.497206  | -0.202452 |
| O | -3.022603 | -1.964322 | 0.278300  | H         | -1.978194 | 2.311118  | -1.909331 |
| O | -2.864565 | 0.087628  | -1.193451 | H         | -3.648384 | 2.741002  | -1.427455 |
| C | -4.303954 | 0.176979  | -1.221318 | C         | -2.769592 | 0.508128  | 2.476595  |
| H | -4.534208 | 0.383815  | -2.272504 | H         | -2.445661 | 1.498507  | 2.814159  |
| H | -4.725067 | -0.799696 | -0.960202 | H         | -3.424956 | 0.067446  | 3.239024  |
| C | -4.852508 | 1.278153  | -0.319966 | H         | -1.874522 | -0.097080 | 2.344617  |
| H | -4.627720 | 1.075453  | 0.731173  | C         | -4.558168 | 1.635342  | 1.198291  |
| H | -5.942271 | 1.343967  | -0.439426 | H         | -5.241681 | 1.403406  | 2.023890  |
| H | -4.418201 | 2.249664  | -0.584957 | H         | -4.185038 | 2.657601  | 1.337532  |
| C | 2.027149  | -1.280231 | -1.425338 | H         | -5.113384 | 1.581099  | 0.260751  |
| H | 1.375534  | -1.115111 | -2.292426 | N         | -2.658897 | -1.257006 | 0.103509  |
| H | 1.450273  | -1.917290 | -0.755886 | S         | 2.456417  | -0.980566 | -0.598730 |
| C | 3.328885  | -1.952831 | -1.865614 | O         | 3.399751  | -0.293255 | -1.484283 |
| H | 3.085164  | -2.903633 | -2.353564 | O         | 1.639585  | -2.078617 | -1.143166 |
| H | 3.888842  | -1.353332 | -2.592331 | C         | -3.289208 | -2.219749 | 1.031444  |



|              |           |           |           |   |           |           |           |
|--------------|-----------|-----------|-----------|---|-----------|-----------|-----------|
| H            | -3.457865 | -1.762592 | 2.007387  | H | 3.818076  | -0.179719 | 1.669646  |
| H            | -2.564517 | -3.023158 | 1.187319  | C | 2.596998  | -0.639176 | 0.153998  |
| C            | -4.607081 | -2.783519 | 0.491432  | N | 1.706411  | -0.091490 | -0.707712 |
| H            | -5.023569 | -3.504375 | 1.205142  | N | 3.256146  | -1.769570 | -0.207655 |
| H            | -5.346597 | -1.986706 | 0.349033  | C | 1.557713  | 1.360459  | -0.835845 |
| H            | -4.463426 | -3.294503 | -0.465715 | H | 1.553597  | 1.608338  | -1.904289 |
| C            | 3.506561  | -1.789316 | 0.742949  | H | 0.622307  | 1.707518  | -0.385409 |
| F            | 2.743836  | -2.431907 | 1.642221  | H | 2.418539  | 1.851131  | -0.381675 |
| F            | 4.314664  | -2.686104 | 0.154743  | C | 0.875460  | -0.898315 | -1.597826 |
| F            | 4.260923  | -0.887174 | 1.381334  | H | 0.961239  | -1.952380 | -1.327555 |
| N            | 1.601859  | -0.020323 | 0.415824  | H | -0.169203 | -0.586757 | -1.487604 |
| S            | 0.760710  | 1.238063  | -0.086567 | H | 1.177274  | -0.775397 | -2.647422 |
| O            | 0.366224  | 1.227090  | -1.509636 | C | 3.838102  | -2.667392 | 0.793705  |
| O            | -0.295755 | 1.518339  | 0.906951  | H | 3.809499  | -3.687212 | 0.393194  |
| C            | 1.902194  | 2.734115  | 0.077865  | H | 4.872739  | -2.391919 | 1.025216  |
| F            | 2.934348  | 2.648925  | -0.763167 | H | 3.245055  | -2.629890 | 1.709752  |
| F            | 1.203704  | 3.851913  | -0.207072 | C | 3.791442  | -1.931038 | -1.561578 |
| F            | 2.367110  | 2.834632  | 1.331791  | H | 4.882285  | -2.005487 | -1.499066 |
| C            | -1.454544 | -1.733637 | -0.633542 | H | 3.387184  | -2.835097 | -2.035495 |
| H            | -0.689783 | -1.950235 | 0.119752  | H | 3.553566  | -1.055912 | -2.164268 |
| H            | -1.067110 | -0.902362 | -1.220163 | N | 2.831810  | -0.117189 | 1.360802  |
| C            | -1.664899 | -2.966621 | -1.509369 | C | 1.907237  | 0.662540  | 2.191294  |
| H            | -0.700351 | -3.218068 | -1.960952 | H | 0.956301  | 0.775281  | 1.667971  |
| H            | -1.994465 | -3.836982 | -0.931080 | H | 1.702028  | 0.069749  | 3.094096  |
| H            | -2.388427 | -2.796155 | -2.314044 | C | 2.490725  | 2.015450  | 2.604829  |
|              |           |           |           | H | 2.665286  | 2.663600  | 1.740648  |
| <b>1a+1a</b> |           |           |           | H | 1.793322  | 2.521870  | 3.282114  |

|   |           |           |           |   |           |           |           |
|---|-----------|-----------|-----------|---|-----------|-----------|-----------|
| H | 3.446800  | 1.890072  | 3.124815  | H | -4.243705 | 0.226158  | -2.580311 |
| S | 6.148754  | 0.613835  | 0.428073  | H | -5.063539 | -1.336354 | -2.839438 |
| O | 5.097079  | 0.931333  | -0.575617 | C | -6.449167 | 1.194504  | -1.060201 |
| O | 7.112519  | 1.693031  | 0.695533  | H | -5.674343 | 1.927181  | -1.308407 |
| O | 5.605008  | -0.073513 | 1.640584  | H | -7.344320 | 1.388588  | -1.663299 |
| O | 7.033818  | -0.648830 | -0.254774 | H | -6.680573 | 1.301787  | -0.001810 |
| C | 7.905052  | -0.273225 | -1.337188 | N | -4.676872 | -1.832337 | -0.345568 |
| H | 8.610423  | 0.486172  | -0.981827 | C | -4.539489 | -3.172577 | 0.231094  |
| H | 7.309172  | 0.161657  | -2.151133 | H | -5.485681 | -3.452418 | 0.700089  |
| C | 8.631657  | -1.527174 | -1.798552 | H | -4.376019 | -3.874843 | -0.597915 |
| H | 7.924748  | -2.284833 | -2.156712 | C | -3.373638 | -3.272817 | 1.217360  |
| H | 9.317413  | -1.281060 | -2.619096 | H | -3.515998 | -2.620856 | 2.084252  |
| H | 9.214113  | -1.960968 | -0.978240 | H | -3.276409 | -4.306064 | 1.569463  |
| H | -3.810135 | -1.360336 | -0.660056 | H | -2.431823 | -2.986215 | 0.737873  |
| C | -5.761004 | -1.051451 | -0.338839 | S | -2.634565 | 0.939831  | 0.270021  |
| N | -6.718183 | -1.166264 | 0.622086  | O | -3.864217 | 0.806692  | 1.093023  |
| N | -5.920306 | -0.146626 | -1.330593 | O | -1.395647 | 1.206471  | 1.022489  |
| C | -6.361482 | -1.346985 | 2.031241  | O | -2.509695 | -0.134003 | -0.768662 |
| H | -6.905840 | -0.604714 | 2.626728  | O | -2.888919 | 2.272623  | -0.707878 |
| H | -6.629330 | -2.347340 | 2.395024  | C | -2.878560 | 3.552670  | -0.034099 |
| H | -5.295512 | -1.163262 | 2.162303  | H | -1.922735 | 3.671498  | 0.487131  |
| C | -8.135884 | -0.965316 | 0.338643  | H | -3.685832 | 3.573829  | 0.708924  |
| H | -8.304562 | -0.961559 | -0.739308 | C | -3.068222 | 4.627231  | -1.091704 |
| H | -8.707188 | -1.790749 | 0.780669  | H | -4.025094 | 4.507112  | -1.612553 |
| H | -8.509188 | -0.024048 | 0.763091  | H | -3.055886 | 5.617164  | -0.619857 |
| C | -5.214371 | -0.279814 | -2.610156 | H | -2.263958 | 4.588573  | -1.834067 |
| H | -5.839163 | 0.167923  | -3.389855 |   |           |           |           |

|              |           |           |           |   |           |           |           |
|--------------|-----------|-----------|-----------|---|-----------|-----------|-----------|
| <b>1b+1b</b> |           |           |           | C | -5.008841 | 3.456551  | -2.345370 |
| C            | -2.283643 | 3.192980  | 0.076627  | H | -5.988073 | 3.935592  | -2.456457 |
| N            | -1.033420 | 2.798538  | -0.227901 | H | -4.287175 | 3.995821  | -2.969160 |
| N            | -2.495985 | 4.030067  | 1.129131  | H | -5.090843 | 2.430559  | -2.719290 |
| C            | -0.684082 | 2.325544  | -1.574368 | C | -5.148992 | -1.672179 | -2.379105 |
| H            | 0.384654  | 2.492671  | -1.723021 | F | -6.077429 | -0.721557 | -2.544113 |
| H            | -0.899538 | 1.257753  | -1.690631 | F | -4.652717 | -2.001193 | -3.582068 |
| H            | -1.251764 | 2.884735  | -2.321603 | F | -5.716612 | -2.752379 | -1.835694 |
| C            | -0.036966 | 2.513438  | 0.814880  | N | -4.596792 | -0.723697 | 0.000558  |
| H            | -0.503463 | 2.550860  | 1.798576  | S | -3.912221 | -0.243827 | 1.376918  |
| H            | 0.355193  | 1.505388  | 0.659578  | O | -2.476101 | 0.080929  | 1.272428  |
| H            | 0.800273  | 3.214433  | 0.759488  | O | -4.800226 | 0.703939  | 2.059531  |
| C            | -3.652328 | 3.890333  | 2.019982  | C | -3.986049 | -1.784009 | 2.464163  |
| H            | -3.291858 | 3.844581  | 3.054624  | F | -3.273085 | -2.783585 | 1.919866  |
| H            | -4.331707 | 4.747277  | 1.927791  | F | -3.467183 | -1.499074 | 3.670230  |
| H            | -4.187974 | 2.963816  | 1.815646  | F | -5.248769 | -2.193810 | 2.623958  |
| C            | -1.528003 | 5.056540  | 1.511465  | H | -3.197042 | 1.898772  | -1.187494 |
| H            | -2.066229 | 5.997765  | 1.677056  | C | 2.277362  | -3.171080 | 0.014755  |
| H            | -0.998953 | 4.794469  | 2.436163  | N | 1.033247  | -2.746404 | -0.272241 |
| H            | -0.797042 | 5.208628  | 0.715661  | N | 2.486065  | -3.999687 | 1.074138  |
| N            | -3.306406 | 2.788260  | -0.691191 | C | 0.667152  | -2.290947 | -1.620089 |
| S            | -3.721385 | -1.052704 | -1.317341 | H | -0.405681 | -2.448912 | -1.749707 |
| O            | -2.776193 | -2.175330 | -1.223696 | H | 0.893801  | -1.227871 | -1.756341 |
| O            | -3.239980 | 0.165859  | -2.016080 | H | 1.216979  | -2.868248 | -2.366798 |
| C            | -4.591889 | 3.472655  | -0.874168 | C | 0.065992  | -2.417115 | 0.784925  |
| H            | -4.478725 | 4.499921  | -0.517409 | H | 0.553158  | -2.446393 | 1.758832  |
| H            | -5.360032 | 2.985771  | -0.261053 | H | -0.305492 | -1.402999 | 0.619267  |

|   |           |           |           |              |           |           |           |
|---|-----------|-----------|-----------|--------------|-----------|-----------|-----------|
| H | -0.789821 | -3.098008 | 0.761972  | O            | 5.112439  | -0.663532 | 1.987442  |
| C | 3.655903  | -3.872308 | 1.948510  | C            | 3.983451  | 1.698091  | 2.474262  |
| H | 3.309858  | -3.804014 | 2.986760  | F            | 2.943926  | 2.460909  | 2.093380  |
| H | 4.316956  | -4.743727 | 1.859668  | F            | 3.782854  | 1.311231  | 3.743982  |
| H | 4.209088  | -2.961097 | 1.724788  | F            | 5.102623  | 2.425985  | 2.415930  |
| C | 1.496101  | -4.992863 | 1.484324  | H            | 3.211155  | -1.907190 | -1.259674 |
| H | 2.009273  | -5.946310 | 1.658175  |              |           |           |           |
| H | 0.983270  | -4.703473 | 2.410330  | <b>2a+2a</b> |           |           |           |
| H | 0.754733  | -5.133614 | 0.696653  | C            | -3.486662 | -1.338447 | -0.021821 |
| N | 3.296240  | -2.807406 | -0.778734 | N            | -2.532316 | -1.864152 | -0.816830 |
| S | 3.699552  | 1.073841  | -1.291319 | N            | -4.453815 | -0.562453 | -0.559701 |
| O | 2.725431  | 2.163286  | -1.119236 | C            | -1.939744 | -3.183059 | -0.564690 |
| O | 3.218823  | -0.140197 | -1.997724 | H            | -1.852383 | -3.697885 | -1.528732 |
| C | 4.558574  | -3.528880 | -0.972787 | H            | -0.942542 | -3.109322 | -0.118418 |
| H | 4.421070  | -4.549905 | -0.606661 | H            | -2.597691 | -3.761111 | 0.085918  |
| H | 5.349967  | -3.061197 | -0.374120 | C            | -1.915020 | -1.103506 | -1.914673 |
| C | 4.956202  | -3.535062 | -2.449471 | H            | -2.186734 | -0.048666 | -1.845744 |
| H | 5.919401  | -4.043222 | -2.570825 | H            | -0.829319 | -1.206040 | -1.814450 |
| H | 4.210250  | -4.056388 | -3.059696 | H            | -2.217252 | -1.509814 | -2.889205 |
| H | 5.063484  | -2.514255 | -2.831773 | C            | -5.028242 | 0.592034  | 0.136906  |
| C | 5.045274  | 1.769677  | -2.411004 | H            | -5.009658 | 1.442986  | -0.548749 |
| F | 5.993097  | 0.856672  | -2.655396 | H            | -6.064442 | 0.389991  | 0.441457  |
| F | 4.470940  | 2.114905  | -3.574741 | H            | -4.408625 | 0.862171  | 0.989149  |
| F | 5.606679  | 2.853711  | -1.868766 | C            | -4.887886 | -0.715276 | -1.947348 |
| N | 4.654367  | 0.751806  | -0.030883 | H            | -5.981511 | -0.639918 | -1.975608 |
| S | 4.085775  | 0.175675  | 1.361204  | H            | -4.465143 | 0.070909  | -2.582826 |
| O | 2.697039  | -0.321781 | 1.305443  | H            | -4.593798 | -1.694420 | -2.327993 |

|   |           |           |           |   |          |           |           |
|---|-----------|-----------|-----------|---|----------|-----------|-----------|
| N | -3.496899 | -1.646292 | 1.304019  | C | 3.394935 | 1.361242  | 0.143166  |
| C | -4.749803 | -1.755301 | 2.074389  | N | 2.483048 | 1.558832  | 1.113391  |
| H | -5.205298 | -0.772102 | 2.240700  | N | 3.007380 | 1.206461  | -1.137129 |
| H | -4.459415 | -2.127127 | 3.059027  | C | 2.765097 | 2.352166  | 2.305159  |
| C | -5.767551 | -2.721620 | 1.464944  | H | 1.891615 | 2.980200  | 2.510581  |
| H | -6.636480 | -2.801230 | 2.128505  | H | 2.945391 | 1.712822  | 3.179242  |
| H | -6.124549 | -2.383190 | 0.487266  | H | 3.633879 | 2.989226  | 2.137799  |
| H | -5.335382 | -3.721620 | 1.347090  | C | 1.167329 | 0.902219  | 1.121512  |
| S | -2.064405 | 2.593563  | -0.226602 | H | 1.092464 | 0.205212  | 0.291251  |
| O | -2.079334 | 1.494764  | 0.771116  | H | 1.085236 | 0.328805  | 2.052098  |
| O | -2.601177 | 2.194857  | -1.556548 | H | 0.363809 | 1.638438  | 1.070140  |
| O | -0.793971 | 3.359025  | -0.288557 | C | 3.693753 | 0.283036  | -2.044552 |
| O | -3.197024 | 3.643166  | 0.430699  | H | 2.943023 | -0.389384 | -2.468744 |
| C | -3.239872 | 4.989239  | -0.088288 | H | 4.202031 | 0.830881  | -2.849665 |
| H | -3.639092 | 5.581351  | 0.742787  | H | 4.398546 | -0.334994 | -1.490639 |
| H | -2.217167 | 5.326351  | -0.289468 | C | 1.783150 | 1.802239  | -1.683804 |
| C | -4.125738 | 5.122421  | -1.322406 | H | 2.038279 | 2.297199  | -2.629132 |
| H | -3.733135 | 4.528229  | -2.152410 | H | 1.037192 | 1.028102  | -1.887761 |
| H | -4.171238 | 6.175023  | -1.632537 | H | 1.350217 | 2.534550  | -1.003709 |
| H | -5.146363 | 4.785005  | -1.105668 | N | 4.725211 | 1.374778  | 0.467566  |
| C | -2.237134 | -1.558192 | 2.089693  | C | 5.734912 | 1.930185  | -0.452452 |
| H | -2.333766 | -0.683411 | 2.746283  | H | 5.880005 | 1.286506  | -1.328468 |
| H | -1.432325 | -1.329163 | 1.392573  | H | 6.678981 | 1.914360  | 0.097543  |
| C | -1.891457 | -2.803431 | 2.906462  | C | 5.440881 | 3.366286  | -0.890428 |
| H | -0.930395 | -2.636886 | 3.404136  | H | 6.258138 | 3.730081  | -1.524003 |
| H | -2.635084 | -3.019466 | 3.682601  | H | 4.513615 | 3.437909  | -1.466967 |
| H | -1.776499 | -3.688679 | 2.275667  | H | 5.358326 | 4.031749  | -0.023791 |

|              |           |           |           |   |           |           |           |
|--------------|-----------|-----------|-----------|---|-----------|-----------|-----------|
| S            | 2.080089  | -2.507244 | -0.036336 | H | -1.688303 | 4.966586  | -1.216489 |
| O            | 3.117913  | -1.646089 | 0.572366  | C | -1.327816 | 3.490820  | 1.825295  |
| O            | 1.415310  | -1.900996 | -1.229380 | H | -1.859987 | 2.659465  | 2.286487  |
| O            | 1.107885  | -3.106615 | 0.913228  | H | -0.295119 | 3.174897  | 1.648075  |
| O            | 3.012056  | -3.769353 | -0.610890 | H | -1.327416 | 4.364984  | 2.488821  |
| C            | 2.326020  | -4.905550 | -1.173262 | C | -5.055755 | 2.075648  | 1.090538  |
| H            | 2.934894  | -5.768867 | -0.881785 | H | -5.053081 | 1.680431  | 2.110821  |
| H            | 1.345321  | -5.012664 | -0.696087 | H | -6.074496 | 2.397239  | 0.836671  |
| C            | 2.210654  | -4.810147 | -2.690342 | H | -4.728441 | 1.272759  | 0.431266  |
| H            | 1.615265  | -3.939229 | -2.979680 | C | -4.260037 | 4.170499  | 2.120415  |
| H            | 1.731856  | -5.715664 | -3.087187 | H | -5.317052 | 4.447999  | 2.206673  |
| H            | 3.202956  | -4.719399 | -3.147091 | H | -3.933602 | 3.748763  | 3.078867  |
| C            | 5.220629  | 0.489446  | 1.549255  | H | -3.678140 | 5.067645  | 1.904779  |
| H            | 5.810656  | -0.306551 | 1.074606  | N | -3.288968 | 2.884438  | -1.149897 |
| H            | 4.354915  | -0.012214 | 1.982283  | S | -3.341447 | -1.927135 | -0.945170 |
| C            | 6.061201  | 1.183958  | 2.623140  | O | -2.625816 | -3.183016 | -0.682690 |
| H            | 6.385793  | 0.436253  | 3.356254  | O | -3.084289 | -1.213281 | -2.204572 |
| H            | 6.965855  | 1.647810  | 2.213456  | C | -4.587915 | 3.017054  | -1.839921 |
| H            | 5.497853  | 1.955865  | 3.156286  | H | -5.408585 | 2.728138  | -1.182689 |
|              |           |           |           | H | -4.581439 | 2.291404  | -2.657096 |
| <b>2b+2b</b> |           |           |           | C | -4.830612 | 4.431507  | -2.376792 |
| C            | -3.111914 | 3.287311  | 0.130147  | H | -5.797330 | 4.472035  | -2.893078 |
| N            | -1.929597 | 3.812123  | 0.523109  | H | -4.855172 | 5.163885  | -1.561250 |
| N            | -4.122471 | 3.204589  | 1.031907  | H | -4.052056 | 4.732521  | -3.084851 |
| C            | -1.100000 | 4.636567  | -0.359872 | C | -5.160848 | -2.409568 | -1.065464 |
| H            | -0.774677 | 5.517818  | 0.206088  | F | -5.929147 | -1.329647 | -1.294018 |
| H            | -0.214911 | 4.090140  | -0.696386 | F | -5.321620 | -3.268097 | -2.083650 |

|   |           |           |           |   |           |           |           |
|---|-----------|-----------|-----------|---|-----------|-----------|-----------|
| F | -5.578451 | -2.998984 | 0.063148  | C | 2.052333  | -2.502181 | 1.735013  |
| N | -3.435843 | -0.866224 | 0.283943  | H | 1.096038  | -2.083860 | 2.061153  |
| S | -2.520221 | -0.906866 | 1.609202  | H | 2.458168  | -3.132060 | 2.538452  |
| O | -1.194555 | -1.517123 | 1.448735  | H | 2.731374  | -1.676619 | 1.528378  |
| O | -2.630812 | 0.411573  | 2.250228  | C | 0.620425  | -4.166399 | 0.587002  |
| C | -3.417597 | -2.041972 | 2.824910  | H | 0.672446  | -4.733814 | 1.523975  |
| F | -3.476073 | -3.297464 | 2.361552  | H | -0.309782 | -3.593416 | 0.576170  |
| F | -2.761550 | -2.046820 | 3.996764  | H | 0.631582  | -4.868300 | -0.248280 |
| F | -4.669840 | -1.604471 | 3.040114  | N | 3.887339  | -3.044269 | -0.550742 |
| C | -2.218926 | 2.139903  | -1.871258 | S | 4.517943  | 1.149008  | 1.050088  |
| H | -2.587019 | 1.116118  | -2.003770 | O | 5.540907  | 0.883924  | 0.024963  |
| H | -1.348709 | 2.084013  | -1.217245 | O | 4.180939  | 0.048265  | 1.969049  |
| C | -1.828016 | 2.725151  | -3.228777 | C | 4.682906  | -3.548945 | 0.591044  |
| H | -1.038812 | 2.098682  | -3.657765 | H | 4.500369  | -2.950187 | 1.487950  |
| H | -2.664244 | 2.726784  | -3.937019 | H | 5.725966  | -3.373744 | 0.321237  |
| H | -1.437413 | 3.744812  | -3.150935 | C | 4.484255  | -5.039107 | 0.871677  |
| C | 2.539351  | -3.183424 | -0.598424 | H | 5.161475  | -5.348115 | 1.676195  |
| N | 1.903142  | -3.262217 | -1.795099 | H | 3.463071  | -5.268779 | 1.190769  |
| N | 1.800962  | -3.293548 | 0.524517  | H | 4.712629  | -5.641617 | -0.015101 |
| C | 2.497961  | -3.879043 | -2.974365 | C | 5.230450  | 2.509160  | 2.143738  |
| H | 1.740724  | -4.507478 | -3.457874 | F | 4.365758  | 2.872228  | 3.098832  |
| H | 2.837161  | -3.130613 | -3.702257 | F | 6.338998  | 2.026833  | 2.729113  |
| H | 3.341693  | -4.505888 | -2.684489 | F | 5.561806  | 3.586300  | 1.421564  |
| C | 0.584507  | -2.647812 | -2.002809 | N | 3.226652  | 2.001008  | 0.538447  |
| H | 0.339501  | -1.999160 | -1.164029 | S | 2.255964  | 1.465681  | -0.612686 |
| H | 0.630085  | -2.033270 | -2.908535 | O | 2.289502  | 0.012939  | -0.859560 |
| H | -0.199861 | -3.402367 | -2.121428 | O | 0.951543  | 2.131598  | -0.477454 |

|              |          |           |           |   |          |           |           |
|--------------|----------|-----------|-----------|---|----------|-----------|-----------|
| C            | 2.924441 | 2.207270  | -2.218608 | H | 6.489279 | 1.093067  | -0.794741 |
| F            | 4.127759 | 1.708605  | -2.525786 | C | 8.203282 | 0.462964  | 2.068411  |
| F            | 2.075472 | 1.914792  | -3.226644 | H | 9.194527 | 0.303370  | 1.627627  |
| F            | 3.020101 | 3.542773  | -2.126329 | H | 8.175255 | 1.474909  | 2.491913  |
| C            | 4.598078 | -2.121340 | -1.474751 | H | 8.054383 | -0.264206 | 2.867754  |
| H            | 5.011387 | -1.310995 | -0.865386 | N | 5.580550 | -1.216373 | 0.215752  |
| H            | 3.850191 | -1.660331 | -2.119308 | S | 1.792892 | -0.881445 | -0.534060 |
| C            | 5.717128 | -2.765499 | -2.296287 | O | 0.566992 | -0.555203 | 0.206384  |
| H            | 6.180642 | -1.991948 | -2.919054 | O | 2.742218 | -1.812976 | 0.131474  |
| H            | 6.508668 | -3.183675 | -1.664670 | C | 6.288084 | -1.681562 | -0.984842 |
| H            | 5.355465 | -3.560269 | -2.956300 | H | 7.361521 | -1.591213 | -0.799640 |
| <b>1a+1b</b> |          |           |           | H | 6.036111 | -1.034064 | -1.833120 |
| C            | 6.093601 | -0.493267 | 1.217195  | C | 5.917475 | -3.130581 | -1.303031 |
| N            | 5.537520 | -0.572190 | 2.447740  | H | 6.425197 | -3.445870 | -2.221220 |
| N            | 7.193603 | 0.282195  | 1.027107  | H | 6.218183 | -3.805117 | -0.493501 |
| C            | 4.676924 | -1.697451 | 2.826474  | H | 4.839247 | -3.236201 | -1.460348 |
| H            | 4.754987 | -1.832789 | 3.909618  | C | 1.228073 | -1.816540 | -2.069123 |
| H            | 3.631254 | -1.512065 | 2.558314  | F | 2.272520 | -2.195824 | -2.816987 |
| H            | 5.015047 | -2.610022 | 2.331939  | F | 0.572339 | -2.915568 | -1.661097 |
| C            | 5.406810 | 0.613424  | 3.302984  | F | 0.402279 | -1.072826 | -2.809850 |
| H            | 5.819613 | 1.488206  | 2.803587  | N | 2.519688 | 0.328218  | -1.314821 |
| H            | 4.343261 | 0.803386  | 3.478365  | S | 3.249773 | 1.541900  | -0.544248 |
| H            | 5.912917 | 0.456319  | 4.262779  | O | 3.468859 | 1.311818  | 0.897210  |
| C            | 7.400805 | 1.063981  | -0.198161 | O | 4.375273 | 2.015793  | -1.357541 |
| H            | 7.640829 | 2.094665  | 0.087137  | C | 1.996350 | 2.948999  | -0.629482 |
| H            | 8.232939 | 0.664698  | -0.790984 | F | 0.876810 | 2.620817  | 0.029187  |
|              |          |           |           | F | 2.526567 | 4.043616  | -0.062708 |



|   |           |           |           |              |            |           |           |
|---|-----------|-----------|-----------|--------------|------------|-----------|-----------|
| F | 1.686966  | 3.225228  | -1.900908 | H            | -3.093364  | 2.812931  | -0.240524 |
| H | 4.580479  | -1.444601 | 0.261117  | H            | -2.115518  | 3.046279  | -1.705979 |
| H | -4.689146 | 0.391386  | -1.199434 | H            | -3.854486  | 2.706334  | -1.831858 |
| C | -3.705682 | -0.796591 | 0.076070  | S            | -6.965044  | 1.109532  | 0.165532  |
| N | -2.809989 | -0.769511 | 1.095767  | O            | -5.977550  | 0.867981  | 1.252329  |
| N | -4.580703 | -1.828299 | -0.005069 | O            | -7.739869  | 2.354354  | 0.280430  |
| C | -2.422755 | 0.482877  | 1.745889  | O            | -6.410541  | 0.823520  | -1.195067 |
| H | -2.511310 | 0.349791  | 2.831213  | O            | -8.075822  | -0.152079 | 0.300493  |
| H | -1.388387 | 0.755567  | 1.508263  | C            | -8.993267  | -0.048384 | 1.405426  |
| H | -3.110720 | 1.274128  | 1.449555  | H            | -9.552283  | 0.889911  | 1.319191  |
| C | -2.223478 | -1.983155 | 1.655159  | H            | -8.428642  | -0.029745 | 2.347535  |
| H | -2.459592 | -2.837710 | 1.019278  | C            | -9.922225  | -1.250985 | 1.345429  |
| H | -1.135656 | -1.860977 | 1.690621  | H            | -9.362196  | -2.189148 | 1.436688  |
| H | -2.595100 | -2.179241 | 2.670352  | H            | -10.648793 | -1.202953 | 2.166272  |
| C | -5.218495 | -2.191840 | -1.274136 | H            | -10.471088 | -1.269173 | 0.397434  |
| H | -5.400549 | -3.272242 | -1.264352 |              |            |           |           |
| H | -6.165410 | -1.658882 | -1.410101 | <b>1a+2a</b> |            |           |           |
| H | -4.549582 | -1.952808 | -2.103113 | C            | -4.591958  | -1.467890 | -0.345743 |
| C | -5.248393 | -2.351766 | 1.189335  | N            | -3.521968  | -2.256886 | -0.599767 |
| H | -6.326530 | -2.196385 | 1.079106  | N            | -5.042474  | -0.629650 | -1.300269 |
| H | -5.040976 | -3.422344 | 1.314559  | C            | -3.371641  | -3.586301 | -0.014231 |
| H | -4.923197 | -1.802068 | 2.071209  | H            | -2.993023  | -4.264024 | -0.787694 |
| N | -3.737714 | 0.149766  | -0.865398 | H            | -2.655988  | -3.584676 | 0.817342  |
| C | -2.625112 | 0.979364  | -1.337843 | H            | -4.335480  | -3.952937 | 0.338985  |
| H | -1.726585 | 0.729681  | -0.770463 | C            | -2.357216  | -1.781640 | -1.359060 |
| H | -2.426452 | 0.699267  | -2.381777 | H            | -2.425837  | -0.708392 | -1.538088 |
| C | -2.942982 | 2.474654  | -1.270394 | H            | -1.460302  | -1.966925 | -0.757838 |

|   |           |           |           |   |          |           |           |
|---|-----------|-----------|-----------|---|----------|-----------|-----------|
| H | -2.259328 | -2.328065 | -2.305235 | H | 1.656746 | -0.849605 | 0.757983  |
| C | -5.584557 | 0.697671  | -0.989583 | C | 1.839854 | 1.978783  | 2.602234  |
| H | -5.075961 | 1.423539  | -1.628853 | H | 2.477843 | 2.858938  | 2.505791  |
| H | -6.665541 | 0.733318  | -1.179260 | H | 0.790725 | 2.290311  | 2.544227  |
| H | -5.354330 | 0.964898  | 0.039644  | H | 2.021889 | 1.511764  | 3.580099  |
| C | -4.866487 | -0.894752 | -2.728708 | C | 5.258983 | 2.346802  | 0.162621  |
| H | -5.806706 | -0.656094 | -3.239376 | H | 5.820681 | 3.103334  | 0.721915  |
| H | -4.070466 | -0.271005 | -3.149317 | H | 5.954237 | 1.611249  | -0.256414 |
| H | -4.637252 | -1.948398 | -2.892792 | H | 4.720665 | 2.834824  | -0.652280 |
| N | -5.244573 | -1.585036 | 0.843509  | C | 4.876496 | 1.280233  | 2.354882  |
| C | -6.703365 | -1.380740 | 0.952260  | H | 5.796818 | 0.719965  | 2.156971  |
| H | -6.969189 | -0.325325 | 0.825508  | H | 5.098168 | 2.145069  | 2.992971  |
| H | -6.960765 | -1.637381 | 1.981983  | H | 4.184820 | 0.611397  | 2.864181  |
| C | -7.522345 | -2.259263 | 0.005160  | N | 2.991009 | 0.943207  | -0.667911 |
| H | -8.590089 | -2.097918 | 0.192114  | C | 1.757471 | 1.000149  | -1.459884 |
| H | -7.329749 | -2.024698 | -1.046301 | H | 0.927843 | 1.300303  | -0.816934 |
| H | -7.305424 | -3.320979 | 0.167884  | H | 1.883184 | 1.800135  | -2.203209 |
| S | -2.303879 | 1.792759  | 0.002502  | C | 1.469279 | -0.313489 | -2.189740 |
| O | -2.917533 | 0.730082  | 0.839470  | H | 1.289681 | -1.135043 | -1.488599 |
| O | -2.424882 | 1.521972  | -1.458448 | H | 0.580944 | -0.189245 | -2.819799 |
| H | 3.827818  | 0.528307  | -1.114323 | H | 2.310686 | -0.603905 | -2.828434 |
| C | 3.123903  | 1.223165  | 0.631499  | S | 5.322663 | -1.663884 | -0.379175 |
| N | 2.106301  | 1.049306  | 1.509687  | O | 4.322921 | -1.516062 | 0.702319  |
| N | 4.304942  | 1.717880  | 1.078088  | O | 5.512960 | -3.017261 | -0.928098 |
| C | 1.218044  | -0.110880 | 1.428622  | O | 5.195912 | -0.596207 | -1.431299 |
| H | 1.154266  | -0.560604 | 2.427970  | O | 6.747627 | -1.279891 | 0.436676  |
| H | 0.214699  | 0.182826  | 1.105830  | C | 7.990575 | -1.717006 | -0.149630 |

|              |           |           |           |   |           |           |           |
|--------------|-----------|-----------|-----------|---|-----------|-----------|-----------|
| H            | 7.854625  | -2.723096 | -0.559980 | C | -7.674816 | -1.264771 | -2.833006 |
| H            | 8.678075  | -1.780194 | 0.701569  | H | -8.100585 | -1.071566 | -3.823918 |
| C            | 8.522336  | -0.754142 | -1.206069 | H | -6.619453 | -1.533691 | -2.954737 |
| H            | 8.658179  | 0.249760  | -0.785681 | H | -8.212774 | -2.092734 | -2.372224 |
| H            | 9.495810  | -1.107266 | -1.572004 | C | -7.377830 | 1.180647  | -2.680909 |
| H            | 7.834650  | -0.683316 | -2.053725 | H | -7.249660 | 1.969066  | -1.942166 |
| O            | -0.950245 | 2.221546  | 0.424822  | H | -6.399975 | 0.991222  | -3.132918 |
| O            | -3.320669 | 3.083046  | 0.322143  | H | -8.086722 | 1.489288  | -3.458646 |
| C            | -2.867687 | 4.404164  | -0.051874 | C | -8.640661 | 1.520967  | 1.103129  |
| H            | -3.389426 | 5.068106  | 0.645775  | H | -8.349446 | 2.572284  | 1.004567  |
| H            | -1.792392 | 4.478341  | 0.141768  | H | -9.534545 | 1.457104  | 1.736580  |
| C            | -3.203543 | 4.760748  | -1.495339 | H | -7.806658 | 0.995063  | 1.564664  |
| H            | -2.684227 | 4.100596  | -2.195833 | C | -9.838847 | 1.760974  | -1.044543 |
| H            | -2.899987 | 5.796245  | -1.698214 | H | 10.753679 | 1.924629  | -0.463033 |
| H            | -4.282197 | 4.679664  | -1.674868 | H | -9.424412 | 2.739499  | -1.316615 |
| C            | -4.477761 | -1.553648 | 2.115621  | H | 10.096561 | 1.214398  | -1.952861 |
| H            | -4.711538 | -0.599895 | 2.605098  | N | -7.974563 | -1.161036 | 0.045152  |
| H            | -3.420972 | -1.491799 | 1.858581  | S | -2.828412 | -0.809656 | 0.996330  |
| C            | -4.757489 | -2.716515 | 3.069899  | O | -1.550856 | -0.560634 | 0.308764  |
| H            | -4.151887 | -2.582618 | 3.973567  | O | -3.500792 | -2.095635 | 0.751809  |
| H            | -5.805053 | -2.757368 | 3.388644  | C | -8.936832 | -1.597784 | 1.079389  |
| H            | -4.499242 | -3.686334 | 2.633766  | H | -9.375990 | -0.735844 | 1.582732  |
| <b>2b+1b</b> |           |           |           | H | -8.361036 | -2.138123 | 1.835710  |
| C            | -8.220576 | -0.080780 | -0.733157 | C | 10.050179 | -2.484917 | 0.513981  |
| N            | -7.825729 | -0.055170 | -2.024546 | H | 10.722320 | -2.796936 | 1.322070  |
| N            | -8.906214 | 0.980264  | -0.233403 | H | 10.647231 | -1.941409 | -0.227713 |
|              |           |           |           | H | -9.647098 | -3.384392 | 0.038779  |

|   |           |           |           |   |           |           |           |
|---|-----------|-----------|-----------|---|-----------|-----------|-----------|
| C | -2.411351 | -0.814500 | 2.834640  | H | 3.692198  | -1.416356 | 2.041333  |
| F | -3.506193 | -1.008338 | 3.581414  | C | 3.862296  | -2.924561 | -0.996636 |
| F | -1.554604 | -1.824759 | 3.059513  | H | 4.946219  | -2.835698 | -1.119834 |
| F | -1.827218 | 0.331439  | 3.202164  | H | 3.606953  | -3.950290 | -0.702933 |
| N | -3.848847 | 0.456354  | 1.059744  | H | 3.393243  | -2.694425 | -1.953135 |
| S | -4.413894 | 1.183612  | -0.248134 | N | 2.662595  | 0.209789  | 0.326425  |
| O | -4.315076 | 0.415920  | -1.504595 | C | 1.587106  | 1.110389  | 0.773500  |
| O | -5.713758 | 1.795413  | 0.082004  | H | 0.627059  | 0.700628  | 0.457082  |
| C | -3.292106 | 2.678999  | -0.512607 | H | 1.589871  | 1.099554  | 1.871932  |
| F | -2.037095 | 2.295080  | -0.778309 | C | 1.788993  | 2.543548  | 0.280532  |
| F | -3.753668 | 3.391714  | -1.555909 | H | 1.729842  | 2.610312  | -0.811024 |
| F | -3.284897 | 3.462762  | 0.572541  | H | 1.011639  | 3.188990  | 0.704762  |
| H | 3.611456  | 0.491732  | 0.601510  | H | 2.765742  | 2.929435  | 0.589711  |
| C | 2.519141  | -0.997091 | -0.239866 | S | 6.312492  | 1.356917  | 0.012117  |
| N | 1.487036  | -1.257663 | -1.083191 | O | 6.143643  | 2.115846  | -1.228516 |
| N | 3.420881  | -1.967091 | 0.025462  | O | 5.202869  | 1.362833  | 0.997088  |
| C | 0.925507  | -0.241395 | -1.973676 | C | 8.979814  | -1.665536 | -0.322256 |
| H | 0.864422  | -0.661602 | -2.985361 | C | -6.650585 | -1.842421 | 0.033322  |
| H | -0.078863 | 0.055007  | -1.654455 | H | -6.165899 | -1.604777 | 0.986680  |
| H | 1.580741  | 0.629225  | -2.001451 | H | -6.039681 | -1.377366 | -0.739045 |
| C | 0.822251  | -2.559693 | -1.124154 | C | -6.690710 | -3.358884 | -0.146292 |
| H | 1.188915  | -3.191862 | -0.314753 | H | -5.659641 | -3.724573 | -0.113472 |
| H | -0.252816 | -2.404556 | -0.987744 | H | -7.241538 | -3.858603 | 0.658096  |
| H | 0.995578  | -3.066859 | -2.082324 | H | -7.132097 | -3.659410 | -1.102576 |
| C | 4.213551  | -1.975301 | 1.262329  | C | 7.689725  | 2.242022  | 0.954400  |
| H | 4.321535  | -3.016395 | 1.586016  | F | 7.317971  | 3.508958  | 1.201205  |
| H | 5.204403  | -1.540735 | 1.096885  | F | 8.818687  | 2.255766  | 0.237224  |

|              |           |           |           |   |           |           |           |
|--------------|-----------|-----------|-----------|---|-----------|-----------|-----------|
| F            | 7.928964  | 1.631902  | 2.125822  | H | -1.701558 | 3.909814  | 3.204846  |
| N            | 6.768328  | -0.176182 | -0.128302 | N | -0.515894 | 3.803853  | -0.400221 |
| S            | 7.664213  | -0.785012 | -1.349664 | S | -2.952480 | -0.783563 | -1.451352 |
| O            | 6.928007  | -1.889165 | -1.983935 | O | -2.303021 | -2.097916 | -1.591513 |
| O            | 8.391817  | 0.175728  | -2.179623 | O | -2.135481 | 0.409023  | -1.753911 |
| F            | 8.423724  | -2.571844 | 0.501315  | C | -1.341112 | 4.799180  | -1.113628 |
| F            | 9.824071  | -2.305929 | -1.146651 | H | -2.264139 | 4.349310  | -1.496064 |
| F            | 9.681801  | -0.793397 | 0.415155  | H | -0.758135 | 5.090338  | -1.989127 |
|              |           |           |           | C | -1.649641 | 6.051799  | -0.291778 |
| <b>2b+2a</b> |           |           |           | H | -2.196494 | 6.767841  | -0.915786 |
| C            | -0.832503 | 3.355130  | 0.843257  | H | -2.268555 | 5.834584  | 0.584338  |
| N            | 0.155153  | 3.024398  | 1.705141  | H | -0.726583 | 6.533613  | 0.049559  |
| N            | -2.120012 | 3.260946  | 1.244464  | C | -4.329873 | -0.763443 | -2.737804 |
| C            | 1.451449  | 3.711738  | 1.719928  | F | -4.996557 | 0.399575  | -2.717878 |
| H            | 1.698109  | 3.945281  | 2.762794  | F | -3.764817 | -0.908410 | -3.949521 |
| H            | 2.246547  | 3.081871  | 1.312289  | F | -5.192958 | -1.765632 | -2.545950 |
| H            | 1.380349  | 4.642941  | 1.157169  | N | -3.916348 | -0.598165 | -0.162133 |
| C            | 0.053643  | 1.877636  | 2.619301  | S | -3.395458 | -0.737680 | 1.350357  |
| H            | -0.797839 | 1.250752  | 2.353358  | O | -1.928370 | -0.755204 | 1.512711  |
| H            | 0.970209  | 1.289823  | 2.510800  | O | -4.179992 | 0.155212  | 2.213975  |
| H            | -0.037808 | 2.209549  | 3.661495  | C | -3.951709 | -2.465355 | 1.866623  |
| C            | -3.220406 | 2.919432  | 0.335614  | F | -3.332731 | -3.400942 | 1.131728  |
| H            | -3.883927 | 2.223226  | 0.853875  | F | -3.640367 | -2.664458 | 3.160138  |
| H            | -3.795406 | 3.813498  | 0.058674  | F | -5.274312 | -2.604169 | 1.718493  |
| H            | -2.839197 | 2.418705  | -0.553808 | C | 2.704033  | -2.736157 | -0.693700 |
| C            | -2.519507 | 3.461220  | 2.640354  | N | 1.582216  | -2.167760 | -1.169656 |
| H            | -3.378141 | 4.142987  | 2.658877  | N | 3.747423  | -2.942637 | -1.537454 |
| H            | -2.820331 | 2.515633  | 3.103555  |   |           |           |           |

|   |           |           |           |                    |           |           |           |
|---|-----------|-----------|-----------|--------------------|-----------|-----------|-----------|
| C | 0.754224  | -1.259750 | -0.361963 | C                  | 7.056153  | 2.534323  | 0.161320  |
| H | 0.481294  | -0.412466 | -0.995247 | C                  | 0.511680  | 3.088431  | -1.207827 |
| H | -0.165340 | -1.741518 | -0.025883 | H                  | -0.024227 | 2.555338  | -2.004599 |
| H | 1.334429  | -0.883129 | 0.477812  | H                  | 0.966507  | 2.326637  | -0.575652 |
| C | 1.129814  | -2.351709 | -2.551376 | C                  | 1.603750  | 3.972120  | -1.809327 |
| H | 1.622768  | -3.218461 | -2.995349 | H                  | 2.346011  | 3.312894  | -2.269637 |
| H | 0.048049  | -2.514811 | -2.533567 | H                  | 1.225842  | 4.652443  | -2.580964 |
| H | 1.337728  | -1.462134 | -3.157441 | H                  | 2.116636  | 4.564773  | -1.045261 |
| C | 4.640421  | -4.088620 | -1.414694 | C                  | 4.016653  | -2.897014 | 1.397884  |
| H | 4.812428  | -4.506180 | -2.414083 | H                  | 4.747953  | -2.421886 | 0.744601  |
| H | 5.611317  | -3.804357 | -0.989269 | H                  | 3.776996  | -2.138441 | 2.151642  |
| H | 4.183103  | -4.855877 | -0.789494 | C                  | 4.581913  | -4.144235 | 2.081353  |
| C | 4.122827  | -1.961243 | -2.561944 | H                  | 5.490949  | -3.864560 | 2.625983  |
| H | 5.196397  | -1.766711 | -2.470322 | H                  | 3.885044  | -4.571668 | 2.810783  |
| H | 3.909947  | -2.341540 | -3.569533 | H                  | 4.847589  | -4.931354 | 1.367942  |
| H | 3.607407  | -1.016976 | -2.386358 | O                  | 3.249188  | 0.997555  | -1.273428 |
| N | 2.786165  | -3.125452 | 0.605919  | O                  | 4.618152  | 2.360368  | 0.347405  |
| C | 1.618003  | -3.698646 | 1.310680  | C                  | 5.709434  | 2.762371  | -0.511511 |
| H | 0.784387  | -3.717840 | 0.607751  | H                  | 5.541318  | 3.828102  | -0.705459 |
| H | 1.859902  | -4.745642 | 1.540312  | H                  | 5.642386  | 2.232165  | -1.467738 |
| C | 1.210017  | -2.983404 | 2.601069  | H                  | 7.211720  | 1.468774  | 0.352555  |
| H | 0.981978  | -1.928695 | 2.432108  | H                  | 7.106889  | 3.073012  | 1.114435  |
| H | 0.307202  | -3.461705 | 2.996320  | H                  | 7.865139  | 2.900281  | -0.485091 |
| H | 1.985884  | -3.050935 | 3.370717  |                    |           |           |           |
| S | 3.933988  | 0.863475  | 0.043268  | <b>1a+2a+1a+2a</b> |           |           |           |
| O | 5.050920  | -0.113859 | 0.022780  | C                  | 6.588472  | -0.648862 | -0.723707 |
| O | 3.006059  | 0.739098  | 1.193017  | N                  | 5.788171  | -0.861342 | -1.784477 |

|   |          |           |           |   |           |           |           |
|---|----------|-----------|-----------|---|-----------|-----------|-----------|
| N | 7.933795 | -0.792895 | -0.859181 | H | 4.980062  | 0.817326  | 2.689795  |
| C | 4.461672 | -0.253056 | -1.897218 | C | 3.196151  | -2.337825 | 3.618344  |
| H | 4.290125 | -0.008592 | -2.950181 | F | 4.335848  | -1.759515 | 4.020821  |
| H | 3.682972 | -0.943496 | -1.555407 | F | 2.164309  | -1.593407 | 4.058385  |
| H | 4.427630 | 0.677482  | -1.333673 | F | 3.106542  | -3.555290 | 4.160242  |
| C | 6.126451 | -1.833429 | -2.824244 | N | 4.426717  | -3.291068 | 1.507050  |
| H | 6.960339 | -2.455787 | -2.501075 | S | 4.739128  | -4.094388 | 0.143401  |
| H | 5.261006 | -2.484883 | -2.980013 | O | 3.817478  | -3.804410 | -0.969619 |
| H | 6.376156 | -1.330396 | -3.766979 | O | 6.184240  | -4.071144 | -0.103319 |
| C | 8.745123 | -1.448775 | 0.163708  | C | 4.381566  | -5.885751 | 0.612591  |
| H | 9.403175 | -2.176182 | -0.326444 | F | 3.091021  | -6.033877 | 0.950240  |
| H | 9.367747 | -0.732019 | 0.715383  | F | 4.642790  | -6.680243 | -0.437901 |
| H | 8.102382 | -1.993007 | 0.856180  | F | 5.143338  | -6.269835 | 1.643627  |
| C | 8.637500 | -0.298960 | -2.040764 | H | 5.088990  | -0.533292 | 0.643072  |
| H | 9.516204 | 0.266958  | -1.709575 | H | -3.297900 | -2.544669 | -0.199059 |
| H | 8.974947 | -1.118024 | -2.690444 | C | -1.724492 | -3.316583 | -1.191208 |
| H | 7.990420 | 0.382191  | -2.593756 | N | -0.667652 | -4.155588 | -1.064197 |
| N | 6.066586 | -0.304473 | 0.459776  | N | -2.219096 | -3.055220 | -2.424694 |
| S | 3.091818 | -2.422033 | 1.739028  | C | -0.540009 | -5.073586 | 0.070714  |
| O | 1.800641 | -3.064276 | 1.452004  | H | -0.291819 | -6.067925 | -0.319639 |
| O | 3.249611 | -1.014791 | 1.297396  | H | 0.252111  | -4.757781 | 0.755941  |
| C | 6.766327 | 0.470070  | 1.494112  | H | -1.494657 | -5.139906 | 0.592717  |
| H | 7.536912 | 1.062816  | 0.994998  | C | 0.411524  | -4.213521 | -2.050554 |
| H | 7.254053 | -0.211477 | 2.203182  | H | 0.317554  | -3.382632 | -2.751544 |
| C | 5.800514 | 1.387819  | 2.240976  | H | 1.372566  | -4.131884 | -1.532814 |
| H | 6.342107 | 1.895355  | 3.047689  | H | 0.393159  | -5.158383 | -2.610158 |
| H | 5.397474 | 2.153709  | 1.572873  | C | -2.965106 | -1.825846 | -2.715142 |

|   |           |           |           |   |           |           |           |
|---|-----------|-----------|-----------|---|-----------|-----------|-----------|
| H | -2.729883 | -1.518915 | -3.740299 | C | -7.313553 | 0.298421  | 1.152659  |
| H | -4.044748 | -1.985802 | -2.626778 | N | -7.045017 | -0.163134 | 2.399493  |
| H | -2.663092 | -1.028567 | -2.035168 | N | -7.831556 | -0.525668 | 0.219731  |
| C | -2.331237 | -4.104938 | -3.437210 | C | -7.018742 | 0.731586  | 3.558527  |
| H | -3.383219 | -4.199184 | -3.727892 | H | -7.377880 | 0.173335  | 4.429576  |
| H | -1.733361 | -3.863189 | -4.325026 | H | -6.007096 | 1.101498  | 3.763369  |
| H | -2.008144 | -5.060723 | -3.025896 | H | -7.678998 | 1.584154  | 3.389096  |
| N | -2.288278 | -2.734369 | -0.127586 | C | -6.495931 | -1.506693 | 2.626021  |
| C | -1.613814 | -2.300170 | 1.101609  | H | -6.218902 | -1.975056 | 1.681201  |
| H | -0.560086 | -2.577600 | 1.047119  | H | -5.592884 | -1.407274 | 3.239637  |
| H | -1.656478 | -1.202607 | 1.123748  | H | -7.211074 | -2.143254 | 3.160038  |
| C | -2.270529 | -2.858372 | 2.365548  | C | -7.463483 | -0.429782 | -1.200840 |
| H | -2.198430 | -3.949260 | 2.414387  | H | -7.116852 | -1.412398 | -1.531302 |
| H | -1.775105 | -2.442169 | 3.250242  | H | -8.327696 | -0.125254 | -1.804638 |
| H | -3.331641 | -2.590043 | 2.406888  | H | -6.651210 | 0.283190  | -1.339417 |
| S | -5.619066 | -4.061769 | -0.581749 | C | -8.691644 | -1.661867 | 0.569434  |
| O | -4.526971 | -5.027116 | -0.827564 | H | -9.535226 | -1.672036 | -0.130839 |
| O | -6.716582 | -4.528578 | 0.291432  | H | -8.158890 | -2.616025 | 0.496504  |
| O | -5.141839 | -2.680349 | -0.252049 | H | -9.082634 | -1.532735 | 1.580262  |
| O | -6.322599 | -3.774569 | -2.082636 | N | -7.088245 | 1.596374  | 0.885676  |
| C | -6.946898 | -4.921166 | -2.700288 | S | -3.679837 | 3.259211  | 1.263280  |
| H | -7.717773 | -5.314233 | -2.027098 | O | -2.255634 | 2.939637  | 1.427560  |
| H | -6.190130 | -5.700107 | -2.854112 | O | -4.632555 | 2.748325  | 2.273003  |
| C | -7.545962 | -4.464621 | -4.020546 | C | -7.781233 | 2.414476  | -0.117526 |
| H | -6.773892 | -4.059099 | -4.683941 | H | -8.661173 | 1.857735  | -0.448758 |
| H | -8.022704 | -5.313908 | -4.525137 | H | -7.126242 | 2.564982  | -0.981715 |
| H | -8.304149 | -3.689828 | -3.861093 | C | -8.198501 | 3.762510  | 0.471411  |



|   |           |          |           |   |           |          |           |
|---|-----------|----------|-----------|---|-----------|----------|-----------|
| H | -8.693099 | 4.363067 | -0.300628 | H | 1.050978  | 3.879475 | 4.022240  |
| H | -8.895357 | 3.634951 | 1.307981  | C | 3.022880  | 5.819474 | 0.171691  |
| H | -7.328888 | 4.325580 | 0.824396  | H | 2.926115  | 6.829850 | 0.587032  |
| C | -3.777247 | 5.129531 | 1.491198  | H | 4.044897  | 5.668230 | -0.186290 |
| F | -5.040157 | 5.566454 | 1.382997  | H | 2.320831  | 5.710981 | -0.655925 |
| F | -3.320365 | 5.441680 | 2.716150  | C | 3.458466  | 5.034168 | 2.470320  |
| F | -3.022468 | 5.760764 | 0.581999  | H | 4.520928  | 5.112408 | 2.214547  |
| N | -4.343765 | 3.090902 | -0.191346 | H | 3.144001  | 5.942721 | 2.999454  |
| S | -3.705003 | 2.334509 | -1.470169 | H | 3.319323  | 4.172225 | 3.123224  |
| O | -2.534917 | 1.491373 | -1.194263 | N | 1.947000  | 3.213682 | -0.227057 |
| O | -4.813659 | 1.792351 | -2.262325 | C | 0.794362  | 2.602306 | -0.910742 |
| C | -3.045824 | 3.746351 | -2.533819 | H | -0.037963 | 2.523781 | -0.210904 |
| F | -2.072316 | 4.410928 | -1.887152 | H | 0.478230  | 3.297901 | -1.698432 |
| F | -2.537188 | 3.247024 | -3.670831 | C | 1.128492  | 1.248925 | -1.533594 |
| F | -4.021986 | 4.610181 | -2.840154 | H | 1.425863  | 0.515712 | -0.776654 |
| H | -6.323640 | 2.046481 | 1.392385  | H | 0.243268  | 0.869648 | -2.054723 |
| H | 2.800550  | 3.347274 | -0.790882 | H | 1.943794  | 1.346033 | -2.258564 |
| C | 1.948021  | 3.754823 | 0.996901  | S | 5.754559  | 3.471827 | -1.311037 |
| N | 1.220420  | 3.221630 | 2.009616  | O | 5.846446  | 4.122314 | 0.022026  |
| N | 2.697818  | 4.858923 | 1.232071  | O | 6.689366  | 2.335844 | -1.495047 |
| C | 0.936506  | 1.787044 | 2.105686  | O | 4.355643  | 3.185235 | -1.739217 |
| H | 1.123670  | 1.468293 | 3.137910  | O | 6.193882  | 4.628328 | -2.421293 |
| H | -0.108402 | 1.573911 | 1.857187  | C | 7.546597  | 5.121505 | -2.317423 |
| H | 1.601327  | 1.224527 | 1.450759  | H | 8.242426  | 4.283485 | -2.443603 |
| C | 0.593720  | 4.051066 | 3.039056  | H | 7.695173  | 5.554838 | -1.320829 |
| H | 0.689614  | 5.105913 | 2.778962  | C | 7.733088  | 6.163863 | -3.407602 |
| H | -0.469705 | 3.796539 | 3.090771  | H | 7.029751  | 6.993737 | -3.278682 |

|                    |           |           |           |   |           |           |          |
|--------------------|-----------|-----------|-----------|---|-----------|-----------|----------|
| H                  | 8.753490  | 6.564755  | -3.368078 | C | -0.886971 | -3.462085 | 1.433809 |
| H                  | 7.570753  | 5.724634  | -4.397827 | H | -1.965747 | -3.279830 | 1.368945 |
|                    |           |           |           | H | -0.486094 | -3.451169 | 0.415501 |
| <b>1a+1b+1a+1b</b> |           |           |           | H | -0.735341 | -4.462302 | 1.854734 |
| C                  | 2.075079  | -2.694662 | 1.496376  | S | 4.342227  | 0.587704  | 1.805860 |
| N                  | 3.152102  | -3.506311 | 1.590627  | O | 3.751216  | -0.522179 | 2.597501 |
| N                  | 1.831604  | -2.048068 | 0.336460  | O | 4.481506  | 0.252803  | 0.361257 |
| C                  | 3.170655  | -4.694991 | 2.438450  | H | 10.337002 | -0.836066 | 0.601528 |
| H                  | 3.679130  | -5.499085 | 1.894910  | C | 9.704989  | 0.136923  | 2.237389 |
| H                  | 3.715602  | -4.516600 | 3.373740  | N | 8.734051  | 0.113542  | 3.181986 |
| H                  | 2.152372  | -5.009801 | 2.666851  | N | 10.902012 | 0.700452  | 2.535132 |
| C                  | 4.443570  | -3.165393 | 0.979492  | C | 7.856442  | -1.044997 | 3.352159 |
| H                  | 4.432952  | -2.142175 | 0.608068  | H | 7.880156  | -1.338596 | 4.409748 |
| H                  | 5.214429  | -3.230282 | 1.754325  | H | 6.826348  | -0.800617 | 3.076643 |
| H                  | 4.693356  | -3.869861 | 0.176706  | H | 8.244924  | -1.878474 | 2.767623 |
| C                  | 1.306991  | -0.678558 | 0.293819  | C | 8.517921  | 1.213958  | 4.116956 |
| H                  | 1.978240  | -0.083680 | -0.331892 | H | 9.134911  | 2.068286  | 3.833552 |
| H                  | 0.293591  | -0.661002 | -0.129219 | H | 7.462534  | 1.503432  | 4.069777 |
| H                  | 1.322595  | -0.235094 | 1.287529  | H | 8.765965  | 0.919968  | 5.146282 |
| C                  | 2.241627  | -2.582416 | -0.962289 | C | 11.804089 | 1.173118  | 1.483345 |
| H                  | 1.415052  | -2.439360 | -1.668126 | H | 12.384323 | 2.012321  | 1.882970 |
| H                  | 3.123187  | -2.058693 | -1.347853 | H | 12.484731 | 0.379558  | 1.156281 |
| H                  | 2.452801  | -3.649601 | -0.882522 | H | 11.222211 | 1.520112  | 0.627143 |
| N                  | 1.204889  | -2.598313 | 2.538183  | C | 11.536944 | 0.482629  | 3.838120 |
| C                  | -0.241788 | -2.392060 | 2.316323  | H | 12.461451 | -0.086071 | 3.690404 |
| H                  | -0.445853 | -1.391661 | 1.919717  | H | 11.764750 | 1.441338  | 4.321277 |
| H                  | -0.700085 | -2.426192 | 3.306797  | H | 10.883914 | -0.109333 | 4.477083 |

|   |           |           |           |   |           |           |           |
|---|-----------|-----------|-----------|---|-----------|-----------|-----------|
| N | 9.514943  | -0.357997 | 1.010740  | H | 3.580951  | 4.454853  | -0.101927 |
| C | 8.247031  | -0.466218 | 0.282619  | H | 2.373565  | 3.167077  | -0.304784 |
| H | 7.431300  | -0.101384 | 0.908423  | C | 1.704753  | -2.342262 | 3.914042  |
| H | 8.302218  | 0.211150  | -0.581046 | H | 1.396104  | -1.323081 | 4.178582  |
| C | 7.987199  | -1.889340 | -0.217072 | H | 2.792314  | -2.306732 | 3.868169  |
| H | 7.884506  | -2.596999 | 0.612205  | C | 1.211660  | -3.327806 | 4.975299  |
| H | 7.064377  | -1.901018 | -0.808095 | H | 1.617391  | -3.027929 | 5.948351  |
| H | 8.809457  | -2.242236 | -0.849050 | H | 0.119960  | -3.332554 | 5.069765  |
| S | 11.875132 | -2.880940 | 1.609420  | H | 1.537881  | -4.353525 | 4.778348  |
| O | 10.927453 | -2.553330 | 2.698372  | C | 20.133009 | -6.168529 | 1.141949  |
| O | 12.020377 | -4.304694 | 1.260564  | N | 21.210032 | -6.980178 | 1.236200  |
| O | 11.713754 | -1.978386 | 0.416325  | N | 19.889534 | -5.521935 | -0.017966 |
| O | 13.340834 | -2.409608 | 2.293744  | C | 21.228585 | -8.168858 | 2.084023  |
| C | 14.548470 | -2.973437 | 1.743575  | H | 21.737060 | -8.972952 | 1.540483  |
| H | 14.380052 | -4.034380 | 1.531076  | H | 21.773532 | -7.990467 | 3.019313  |
| H | 15.273363 | -2.894341 | 2.561726  | H | 20.210302 | -8.483668 | 2.312424  |
| C | 15.045129 | -2.232045 | 0.506764  | C | 22.501500 | -6.639260 | 0.625065  |
| H | 15.204283 | -1.169650 | 0.727566  | H | 22.490882 | -5.616042 | 0.253641  |
| H | 16.000989 | -2.661459 | 0.177682  | H | 23.272359 | -6.704149 | 1.399898  |
| H | 14.326451 | -2.309413 | -0.314263 | H | 22.751286 | -7.343728 | -0.177720 |
| O | 5.544883  | 1.216525  | 2.398164  | C | 19.364921 | -4.152425 | -0.060607 |
| O | 3.122219  | 1.736193  | 1.904820  | H | 20.036170 | -3.557547 | -0.686319 |
| C | 3.461746  | 3.101821  | 1.573089  | H | 18.351521 | -4.134869 | -0.483646 |
| H | 2.728872  | 3.696975  | 2.128684  | H | 19.380525 | -3.708961 | 0.933102  |
| H | 4.457834  | 3.324803  | 1.969255  | C | 20.299557 | -6.056283 | -1.316716 |
| C | 3.376040  | 3.391443  | 0.078822  | H | 19.472982 | -5.913227 | -2.022553 |
| H | 4.102351  | 2.795449  | -0.481049 | H | 21.181117 | -5.532560 | -1.702280 |

|   |           |           |           |   |           |           |           |
|---|-----------|-----------|-----------|---|-----------|-----------|-----------|
| H | 20.510731 | -7.123468 | -1.236949 | H | 29.280141 | -1.953754 | 0.272716  |
| N | 19.262819 | -6.072180 | 2.183756  | C | 29.594874 | -2.991237 | 3.483693  |
| C | 17.816141 | -5.865927 | 1.961896  | H | 30.519381 | -3.559938 | 3.335977  |
| H | 17.612076 | -4.865528 | 1.565290  | H | 29.822680 | -2.032528 | 3.966850  |
| H | 17.357844 | -5.900059 | 2.952370  | H | 28.941844 | -3.583200 | 4.122656  |
| C | 17.170958 | -6.935952 | 1.079382  | N | 27.572873 | -3.831864 | 0.656313  |
| H | 16.092182 | -6.753697 | 1.014518  | C | 26.304961 | -3.940085 | -0.071807 |
| H | 17.571835 | -6.925036 | 0.061074  | H | 25.489230 | -3.575251 | 0.553996  |
| H | 17.322588 | -7.936169 | 1.500307  | H | 26.360148 | -3.262716 | -0.935473 |
| S | 22.400157 | -2.886162 | 1.451433  | C | 26.045129 | -5.363207 | -0.571499 |
| O | 21.809146 | -3.996046 | 2.243074  | H | 25.942436 | -6.070866 | 0.257778  |
| O | 22.539436 | -3.221063 | 0.006830  | H | 25.122307 | -5.374885 | -1.162522 |
| H | 28.394932 | -4.309933 | 0.247101  | H | 26.867387 | -5.716103 | -1.203477 |
| C | 27.762919 | -3.336943 | 1.882962  | S | 29.933062 | -6.354807 | 1.254993  |
| N | 26.791981 | -3.360324 | 2.827559  | O | 28.985383 | -6.027197 | 2.343945  |
| N | 28.959942 | -2.773414 | 2.180705  | O | 30.078307 | -7.778561 | 0.906137  |
| C | 25.914372 | -4.518864 | 2.997732  | O | 29.771684 | -5.452253 | 0.061898  |
| H | 25.938086 | -4.812463 | 4.055321  | O | 31.398764 | -5.883475 | 1.939317  |
| H | 24.884278 | -4.274484 | 2.722216  | C | 32.606400 | -6.447304 | 1.389148  |
| H | 26.302854 | -5.352341 | 2.413196  | H | 32.437982 | -7.508247 | 1.176649  |
| C | 26.575851 | -2.259908 | 3.762529  | H | 33.331293 | -6.368208 | 2.207299  |
| H | 27.192841 | -1.405580 | 3.479125  | C | 33.103059 | -5.705912 | 0.152337  |
| H | 25.520464 | -1.970434 | 3.715350  | H | 33.262213 | -4.643517 | 0.373139  |
| H | 26.823895 | -2.553898 | 4.791855  | H | 34.058919 | -6.135326 | -0.176744 |
| C | 29.862019 | -2.300748 | 1.128918  | H | 32.384381 | -5.783280 | -0.668690 |
| H | 30.442253 | -1.461545 | 1.528543  | O | 23.602813 | -2.257341 | 2.043737  |
| H | 30.542661 | -3.094308 | 0.801854  | O | 21.180149 | -1.737673 | 1.550393  |

|                    |           |           |           |   |           |           |           |
|--------------------|-----------|-----------|-----------|---|-----------|-----------|-----------|
| C                  | 21.519676 | -0.372045 | 1.218662  | C | 16.250800 | -0.100300 | 2.322300  |
| H                  | 20.786802 | 0.223108  | 1.774257  | H | 15.812800 | -0.379600 | 3.286800  |
| H                  | 22.515764 | -0.149063 | 1.614828  | H | 17.285200 | 0.216700  | 2.486000  |
| C                  | 21.433970 | -0.082423 | -0.275604 | H | 15.646500 | 0.703500  | 1.904300  |
| H                  | 22.160281 | -0.678417 | -0.835476 | C | 16.500700 | -2.585400 | 2.033000  |
| H                  | 21.638881 | 0.980986  | -0.456354 | H | 17.486100 | -2.517800 | 2.504900  |
| H                  | 20.431495 | -0.306789 | -0.659211 | H | 15.762400 | -2.868300 | 2.791000  |
| C                  | 19.762683 | -5.816129 | 3.559615  | H | 16.529300 | -3.346800 | 1.253000  |
| H                  | 19.454034 | -4.796948 | 3.824155  | N | 16.035500 | -0.163800 | -0.645900 |
| H                  | 20.850244 | -5.780599 | 3.513742  | S | 11.407500 | 2.366200  | -1.456100 |
| C                  | 19.269590 | -6.801673 | 4.620872  | O | 10.371400 | 1.699900  | -2.468400 |
| H                  | 19.675321 | -6.501796 | 5.593924  | O | 12.918600 | 2.501000  | -1.957000 |
| H                  | 18.177890 | -6.806421 | 4.715338  | C | 17.390200 | 0.453400  | -0.514500 |
| H                  | 19.595811 | -7.827392 | 4.423921  | H | 17.529700 | 0.890900  | 0.474900  |
| <b>2b+1b+2b+1b</b> |           |           |           | H | 17.414600 | 1.265200  | -1.242300 |
| C                  | 15.659100 | -1.176400 | 0.167500  | C | 18.507600 | -0.556800 | -0.828400 |
| N                  | 14.818600 | -2.144600 | -0.257700 | H | 19.481500 | -0.060300 | -0.772300 |
| N                  | 16.176300 | -1.277500 | 1.424700  | H | 18.501200 | -1.379600 | -0.109700 |
| C                  | 14.627800 | -2.469100 | -1.688300 | H | 18.379600 | -0.957100 | -1.838200 |
| H                  | 14.595200 | -3.558500 | -1.794800 | C | 10.754100 | 4.165800  | -1.052400 |
| H                  | 13.685200 | -2.039100 | -2.037400 | F | 11.732900 | 4.820300  | -0.391400 |
| H                  | 15.460900 | -2.070400 | -2.267300 | F | 10.474500 | 4.771900  | -2.232100 |
| C                  | 13.798100 | -2.727200 | 0.652200  | F | 9.633800  | 4.082300  | -0.288800 |
| H                  | 13.780300 | -2.158200 | 1.578500  | N | 11.240100 | 1.858500  | 0.256200  |
| H                  | 12.829500 | -2.596000 | 0.166900  | S | 12.099400 | 0.348400  | 0.480700  |
| H                  | 13.995400 | -3.786300 | 0.842300  | O | 12.017400 | -0.631300 | -0.805100 |
|                    |           |           |           | O | 13.521500 | 0.389400  | 1.218500  |

|   |           |           |           |   |           |           |           |
|---|-----------|-----------|-----------|---|-----------|-----------|-----------|
| C | 10.888100 | -0.419000 | 1.807200  | H | 7.936800  | 2.558900  | -0.190100 |
| F | 9.756800  | -0.807900 | 1.160600  | C | 7.723700  | 1.313100  | 1.572900  |
| F | 11.515600 | -1.501200 | 2.351100  | H | 7.637900  | 0.249800  | 1.817600  |
| F | 10.610900 | 0.500800  | 2.756700  | H | 8.612200  | 1.713200  | 2.064700  |
| H | 5.776100  | 1.019100  | -0.077200 | H | 6.826500  | 1.817400  | 1.936200  |
| C | 6.614000  | 0.489600  | -1.885400 | S | 3.615000  | 0.413200  | 1.694800  |
| N | 7.696200  | -0.056300 | -2.502800 | O | 4.354100  | -0.712900 | 2.535600  |
| N | 5.464000  | 0.629300  | -2.600400 | O | 4.547900  | 1.535500  | 1.009500  |
| C | 8.681200  | -0.912300 | -1.803300 | C | 1.449400  | -1.333500 | -1.583500 |
| H | 8.760700  | -1.859000 | -2.351800 | C | 15.023900 | 0.586200  | -1.470200 |
| H | 9.667500  | -0.437200 | -1.778900 | H | 14.862200 | 1.554400  | -0.994000 |
| H | 8.335900  | -1.125600 | -0.792300 | H | 14.078900 | 0.053900  | -1.406700 |
| C | 8.046600  | 0.305100  | -3.897300 | C | 15.414800 | 0.788300  | -2.938000 |
| H | 7.266800  | 0.949700  | -4.305700 | H | 14.601800 | 1.364400  | -3.391200 |
| H | 8.995900  | 0.846000  | -3.869800 | H | 16.340400 | 1.363600  | -3.048300 |
| H | 8.137900  | -0.592700 | -4.517900 | H | 15.525200 | -0.161200 | -3.468800 |
| C | 4.385300  | 1.527600  | -2.127000 | C | 2.487700  | 1.502700  | 2.863600  |
| H | 3.784100  | 1.817700  | -2.990200 | F | 3.279600  | 2.373100  | 3.533500  |
| H | 3.763600  | 1.015400  | -1.394200 | F | 1.852900  | 0.679900  | 3.745000  |
| H | 4.822700  | 2.412700  | -1.662900 | F | 1.561500  | 2.168500  | 2.125600  |
| C | 5.018500  | -0.435600 | -3.538600 | N | 2.257700  | -0.142300 | 0.710300  |
| H | 4.137600  | -0.905100 | -3.104200 | S | 2.745500  | -1.637400 | -0.136700 |
| H | 4.781400  | -0.007800 | -4.516500 | O | 4.209900  | -1.496900 | -0.771900 |
| H | 5.810400  | -1.174700 | -3.641000 | O | 2.341400  | -3.022500 | 0.530400  |
| N | 6.658600  | 0.921200  | -0.620900 | F | 1.986800  | -0.411100 | -2.433700 |
| C | 7.857500  | 1.495500  | 0.053300  | F | 1.253700  | -2.506800 | -2.237500 |
| H | 8.761000  | 1.020700  | -0.310000 | F | 0.269700  | -0.873800 | -1.082100 |

|   |           |           |           |   |            |           |           |
|---|-----------|-----------|-----------|---|------------|-----------|-----------|
| C | -2.405800 | -0.782600 | 2.649300  | H | 1.260600   | -2.584400 | 2.571100  |
| N | -3.462500 | -0.650400 | 3.491600  | H | 0.495100   | -1.091700 | 3.104100  |
| N | -1.635000 | 0.308100  | 2.419600  | H | -0.028000  | -2.651800 | 3.802000  |
| C | -4.024800 | -1.786300 | 4.248500  | C | -6.530300  | -3.006200 | -2.990000 |
| H | -4.254400 | -1.450100 | 5.265300  | F | -5.290200  | -2.921700 | -3.520900 |
| H | -4.942400 | -2.137200 | 3.765500  | F | -7.080600  | -4.220900 | -3.246500 |
| H | -3.291000 | -2.591100 | 4.288000  | F | -7.331100  | -2.021500 | -3.478800 |
| C | -4.319800 | 0.561400  | 3.460800  | N | -6.104900  | -1.068700 | -1.199200 |
| H | -4.031700 | 1.178900  | 2.612200  | S | -5.500000  | -0.445000 | 0.325300  |
| H | -5.344000 | 0.227500  | 3.289600  | O | -6.048800  | -1.251600 | 1.611800  |
| H | -4.251200 | 1.120500  | 4.399800  | O | -3.957000  | -0.007800 | 0.369200  |
| C | -1.103600 | 0.620700  | 1.068400  | C | -6.489400  | 1.244200  | 0.332900  |
| H | -1.321200 | 1.675400  | 0.867500  | F | -7.763800  | 0.991500  | 0.727300  |
| H | -0.024900 | 0.457900  | 1.010600  | F | -5.887000  | 2.067200  | 1.238700  |
| H | -1.637200 | 0.022700  | 0.333900  | F | -6.475500  | 1.803500  | -0.897500 |
| C | -1.387700 | 1.326900  | 3.463000  | H | -11.698500 | -0.207600 | -2.090900 |
| H | -0.322000 | 1.557700  | 3.459200  | C | -11.563500 | -1.714500 | -0.698300 |
| H | -1.956800 | 2.242800  | 3.272000  | N | -10.737900 | -2.140300 | 0.301400  |
| H | -1.668000 | 0.922900  | 4.437000  | N | -12.870400 | -2.056100 | -0.656800 |
| N | -2.105100 | -1.984600 | 2.100900  | C | -9.783400  | -1.195100 | 0.932300  |
| S | -6.367300 | -2.830900 | -1.044700 | H | -9.903100  | -1.280200 | 2.029900  |
| O | -7.768800 | -3.271700 | -0.413900 | H | -8.738500  | -1.455600 | 0.703200  |
| O | -5.085900 | -3.677900 | -0.608500 | H | -10.061500 | -0.193900 | 0.642800  |
| C | -0.697200 | -2.362500 | 1.757200  | C | -10.689300 | -3.544200 | 0.745100  |
| H | -0.382100 | -1.877400 | 0.831900  | H | -11.488400 | -4.112300 | 0.239200  |
| H | -0.726100 | -3.435200 | 1.553800  | H | -9.718600  | -3.960200 | 0.469600  |
| C | 0.313500  | -2.143900 | 2.894500  | H | -10.836100 | -3.605100 | 1.823200  |

|   |            |           |           |                    |            |           |           |
|---|------------|-----------|-----------|--------------------|------------|-----------|-----------|
| C | -13.732600 | -1.974100 | -1.860600 | C                  | -13.019700 | 3.523700  | -0.495400 |
| H | -14.473400 | -2.778900 | -1.805600 | F                  | -12.530800 | 3.826900  | 0.722500  |
| H | -14.244800 | -1.004600 | -1.891200 | F                  | -14.275200 | 3.996000  | -0.670000 |
| H | -13.113100 | -2.105800 | -2.750300 | F                  | -12.199900 | 4.001200  | -1.468500 |
| C | -13.581800 | -2.197600 | 0.639500  | N                  | -14.751700 | 1.075200  | -0.866500 |
| H | -14.427900 | -1.506500 | 0.686700  | S                  | -15.560600 | 1.284200  | 0.714900  |
| H | -13.938500 | -3.226400 | 0.766400  | O                  | -15.998400 | -0.087100 | 1.406100  |
| H | -12.889600 | -1.944600 | 1.441800  | O                  | -14.819700 | 2.395100  | 1.590600  |
| N | -11.104500 | -0.986500 | -1.722500 | F                  | -17.609100 | 1.274600  | -1.048100 |
| C | -9.704500  | -1.012600 | -2.214100 | F                  | -18.123100 | 2.142400  | 0.936100  |
| H | -9.129800  | -1.704400 | -1.611200 | F                  | -16.875600 | 3.299700  | -0.493100 |
| H | -9.728100  | -1.405700 | -3.239400 |                    |            |           |           |
| C | -9.089600  | 0.395800  | -2.213700 | <b>2b+2a+2b+2a</b> |            |           |           |
| H | -8.962400  | 0.754000  | -1.192800 | C                  | 8.132515   | 3.253406  | -0.261173 |
| H | -8.105100  | 0.357000  | -2.685900 | N                  | 7.001647   | 3.541452  | -0.946575 |
| H | -9.741700  | 1.093700  | -2.746600 | N                  | 9.271234   | 3.002504  | -0.943430 |
| S | -13.063400 | 1.542900  | -0.712600 | C                  | 5.997561   | 4.493406  | -0.450472 |
| O | -12.223500 | 0.911800  | 0.492900  | H                  | 5.756207   | 5.185469  | -1.267201 |
| O | -12.459200 | 1.320000  | -2.194200 | H                  | 5.077157   | 3.980274  | -0.139146 |
| C | -17.180600 | 2.066300  | -0.039000 | H                  | 6.412235   | 5.062919  | 0.382016  |
| C | -3.182800  | -2.821600 | 1.470100  | C                  | 6.626861   | 2.829737  | -2.175997 |
| H | -3.052400  | -2.757800 | 0.385900  | H                  | 7.258551   | 1.956211  | -2.317330 |
| H | -4.144900  | -2.365100 | 1.695400  | H                  | 5.593375   | 2.494720  | -2.064606 |
| C | -3.192800  | -4.295000 | 1.897200  | H                  | 6.695703   | 3.487461  | -3.052665 |
| H | -4.008300  | -4.768200 | 1.343500  | C                  | 10.300733  | 2.068823  | -0.472331 |
| H | -2.259700  | -4.810300 | 1.651300  | H                  | 10.640647  | 1.478244  | -1.328704 |
| H | -3.379400  | -4.404400 | 2.971000  | H                  | 11.161993  | 2.608801  | -0.055910 |



|   |           |           |           |   |           |           |           |
|---|-----------|-----------|-----------|---|-----------|-----------|-----------|
| H | 9.884926  | 1.382994  | 0.268121  | F | 9.940784  | -3.152625 | -3.475657 |
| C | 9.547269  | 3.607587  | -2.246389 | C | 2.991240  | -1.991847 | 0.491950  |
| H | 10.575010 | 3.990260  | -2.239519 | N | 4.233928  | -1.825502 | 0.985132  |
| H | 9.456351  | 2.878946  | -3.047641 | N | 1.961507  | -2.187416 | 1.346933  |
| H | 8.864864  | 4.436926  | -2.430761 | C | 5.225290  | -0.935355 | 0.358441  |
| N | 8.107012  | 3.249513  | 1.096389  | H | 5.673937  | -0.348392 | 1.150538  |
| S | 9.160543  | -1.729713 | 0.551673  | H | 6.001325  | -1.505355 | -0.152369 |
| O | 8.077339  | -2.722626 | 0.583278  | H | 4.720619  | -0.250022 | -0.315504 |
| O | 8.976636  | -0.478799 | 1.339211  | C | 4.665168  | -2.443413 | 2.240565  |
| C | 9.278812  | 3.628493  | 1.912031  | H | 3.996596  | -3.264466 | 2.503935  |
| H | 10.032277 | 2.834008  | 1.919227  | H | 5.671924  | -2.838518 | 2.098584  |
| H | 8.908413  | 3.706801  | 2.935497  | H | 4.688637  | -1.712956 | 3.055132  |
| C | 9.902421  | 4.967490  | 1.514571  | C | 0.835990  | -3.068031 | 1.035640  |
| H | 10.706237 | 5.213487  | 2.217518  | H | 0.619901  | -3.672488 | 1.925848  |
| H | 10.335329 | 4.945752  | 0.509593  | H | -0.065675 | -2.513910 | 0.766789  |
| H | 9.159454  | 5.771803  | 1.551714  | H | 1.106407  | -3.740133 | 0.218568  |
| C | 10.645708 | -2.574389 | 1.348429  | C | 1.852215  | -1.447888 | 2.605542  |
| F | 11.720279 | -1.772472 | 1.356085  | H | 0.835612  | -1.039537 | 2.671546  |
| F | 10.322876 | -2.863197 | 2.621253  | H | 2.008718  | -2.108082 | 3.468028  |
| F | 10.953148 | -3.711506 | 0.717050  | H | 2.554975  | -0.609582 | 2.629666  |
| N | 9.854827  | -1.483788 | -0.893134 | N | 2.780579  | -1.995650 | -0.851117 |
| S | 9.031416  | -0.992529 | -2.182108 | C | 3.754962  | -2.602294 | -1.790600 |
| O | 7.672715  | -0.497453 | -1.908952 | H | 4.586973  | -2.986436 | -1.200105 |
| O | 9.912418  | -0.188158 | -3.035188 | H | 3.264756  | -3.471664 | -2.251009 |
| C | 8.770744  | -2.571521 | -3.183728 | C | 4.268527  | -1.677350 | -2.897022 |
| F | 8.013661  | -3.445932 | -2.504949 | H | 4.780237  | -0.799555 | -2.497686 |
| F | 8.142496  | -2.270078 | -4.335238 | H | 4.988429  | -2.231665 | -3.509347 |

|   |           |           |           |   |           |           |           |
|---|-----------|-----------|-----------|---|-----------|-----------|-----------|
| H | 3.462154  | -1.340605 | -3.557903 | C | -4.154202 | 2.395880  | -1.279931 |
| S | 2.878827  | 1.992375  | 0.891188  | N | -5.039150 | 2.138670  | -2.269155 |
| O | 1.495925  | 1.520708  | 0.656349  | N | -2.936493 | 1.810365  | -1.312702 |
| O | 3.705262  | 2.132124  | -0.333574 | C | -5.976550 | 3.146751  | -2.773135 |
| C | 0.631552  | 4.352514  | 2.328945  | H | -5.944270 | 3.120087  | -3.870161 |
| C | 6.994851  | 2.557273  | 1.810701  | H | -7.001396 | 2.950440  | -2.457334 |
| H | 7.427275  | 1.626579  | 2.226358  | H | -5.664240 | 4.136839  | -2.438202 |
| H | 6.264092  | 2.259625  | 1.059740  | C | -5.205993 | 0.795194  | -2.841675 |
| C | 6.311546  | 3.375599  | 2.901982  | H | -4.701459 | 0.056065  | -2.224783 |
| H | 5.460791  | 2.798312  | 3.267107  | H | -6.276861 | 0.572402  | -2.850859 |
| H | 6.968441  | 3.583934  | 3.752225  | H | -4.819287 | 0.750736  | -3.868608 |
| H | 5.925313  | 4.324971  | 2.516245  | C | -2.206316 | 1.402022  | -0.104482 |
| C | 1.594867  | -1.333956 | -1.444288 | H | -1.825705 | 0.388631  | -0.264059 |
| H | 0.987464  | -0.955980 | -0.626743 | H | -1.349901 | 2.058775  | 0.086133  |
| H | 1.964639  | -0.454106 | -1.987126 | H | -2.878660 | 1.376107  | 0.745181  |
| C | 0.771225  | -2.219020 | -2.381363 | C | -2.267653 | 1.483604  | -2.572699 |
| H | -0.104786 | -1.659669 | -2.720092 | H | -1.218900 | 1.794617  | -2.494019 |
| H | 1.338789  | -2.516110 | -3.270393 | H | -2.294379 | 0.412533  | -2.776725 |
| H | 0.404264  | -3.121436 | -1.887259 | H | -2.737284 | 2.015103  | -3.397830 |
| O | 3.569734  | 1.307944  | 2.015003  | N | -4.484660 | 3.264855  | -0.291800 |
| O | 2.737710  | 3.604111  | 1.352235  | S | -4.246887 | -1.068755 | 2.466358  |
| C | 2.044401  | 3.860953  | 2.593813  | O | -5.188478 | -2.028571 | 3.055372  |
| H | 2.637616  | 4.623118  | 3.111849  | O | -4.792916 | 0.203701  | 1.934422  |
| H | 2.037079  | 2.959178  | 3.212924  | C | -3.480255 | 4.127313  | 0.363705  |
| H | 0.042796  | 3.595403  | 1.769195  | H | -2.818600 | 3.550382  | 1.018332  |
| H | 0.649890  | 5.272897  | 1.725359  | H | -4.048862 | 4.793606  | 1.013085  |
| H | 0.105681  | 4.568592  | 3.276279  | C | -2.658831 | 4.964475  | -0.619784 |

|   |            |           |           |   |            |           |           |
|---|------------|-----------|-----------|---|------------|-----------|-----------|
| H | -1.978994  | 5.616773  | -0.060645 | H | -12.948077 | -2.040935 | 1.783677  |
| H | -2.046218  | 4.342865  | -1.281949 | H | -13.055809 | -1.554666 | 0.076970  |
| H | -3.309298  | 5.593607  | -1.236983 | H | -12.190544 | -3.048481 | 0.530724  |
| C | -3.097913  | -0.526917 | 3.865694  | C | -11.311549 | 0.029618  | 1.662161  |
| F | -2.401717  | 0.550464  | 3.468103  | H | -12.179334 | 0.530724  | 1.222459  |
| F | -3.832499  | -0.191016 | 4.935737  | H | -11.466978 | -0.081012 | 2.743402  |
| F | -2.246977  | -1.497341 | 4.222473  | H | -10.442684 | 0.654306  | 1.458079  |
| N | -3.078049  | -1.730352 | 1.540386  | N | -9.955345  | -2.402160 | -0.666177 |
| S | -3.335965  | -2.267449 | 0.051923  | C | -9.006328  | -3.519547 | -0.865481 |
| O | -4.592467  | -1.829589 | -0.582312 | H | -8.422513  | -3.626441 | 0.049919  |
| O | -2.080053  | -2.172617 | -0.698562 | H | -9.605152  | -4.435374 | -0.964543 |
| C | -3.565806  | -4.132255 | 0.263866  | C | -8.078839  | -3.395027 | -2.077101 |
| F | -4.671896  | -4.400411 | 0.974218  | H | -7.462420  | -2.494515 | -2.035575 |
| F | -3.687282  | -4.708150 | -0.944725 | H | -7.408282  | -4.261601 | -2.093166 |
| F | -2.511293  | -4.678048 | 0.889580  | H | -8.634653  | -3.389733 | -3.019817 |
| C | -9.983964  | -1.696899 | 0.494767  | S | -9.552404  | 1.685338  | -1.301338 |
| N | -8.850079  | -1.425458 | 1.165356  | O | -10.959649 | 1.207786  | -1.360895 |
| N | -11.167427 | -1.279499 | 1.013202  | O | -8.579652  | 0.864087  | -2.057743 |
| C | -7.583369  | -1.132683 | 0.483828  | C | -11.665908 | 4.150451  | -2.699364 |
| H | -7.112937  | -0.274082 | 0.984448  | C | -5.820052  | 3.168026  | 0.363816  |
| H | -6.885916  | -1.974559 | 0.536435  | H | -5.646032  | 2.760461  | 1.376692  |
| H | -7.769942  | -0.856538 | -0.551561 | H | -6.401399  | 2.417638  | -0.168321 |
| C | -8.803358  | -1.324323 | 2.626476  | C | -6.604413  | 4.476824  | 0.437945  |
| H | -9.676277  | -1.812399 | 3.064366  | H | -7.583988  | 4.258903  | 0.866300  |
| H | -7.893887  | -1.820761 | 2.972430  | H | -6.119396  | 5.226112  | 1.074220  |
| H | -8.768360  | -0.276915 | 2.949990  | H | -6.766165  | 4.915124  | -0.551477 |
| C | -12.408119 | -2.022508 | 0.829010  | C | -10.789151 | -2.003853 | -1.824750 |

|   |            |           |           |
|---|------------|-----------|-----------|
| H | -11.389597 | -1.148307 | -1.521371 |
| H | -10.109649 | -1.610644 | -2.588295 |
| C | -11.647004 | -3.126430 | -2.411824 |
| H | -12.235749 | -2.719881 | -3.241756 |
| H | -11.043014 | -3.947312 | -2.813720 |
| H | -12.345723 | -3.548729 | -1.681068 |
| O | -9.115118  | 2.034277  | 0.075760  |
| O | -9.501486  | 3.119539  | -2.165784 |
| C | -10.452289 | 4.141187  | -1.780512 |
| H | -9.897774  | 5.083859  | -1.852168 |
| H | -10.740457 | 4.000554  | -0.732973 |
| H | -12.207878 | 3.203968  | -2.623851 |
| H | -11.359797 | 4.298017  | -3.741568 |
| H | -12.341236 | 4.970022  | -2.419311 |
